# Supplementary material
Source: PubMed Central journal article supplement (PMC9218927)
Supplement: jamadermatol-e222260-s001.pdf [file jamadermatol-e222260-s001.pdf]

## Supplemental Online Content

Hopkins ZH, Thiboutot D, Homsy HA, Perez-Chada LM, Barbieri JS. Patient-reported outcome measures for health-related quality of life in patients with acne vulgaris: a systematic review of measure development and measurement properties. *JAMA Dermatol*. Published online June 22, 2022. doi:10.1001/jamadermatol.2022.2260

**eTable 1.** Results of quality assessment per study

**eTable 2.** Diagnostic performance of serological tests – test combinations

**eAppendix 1.** Search strategy for Medline (using PubMed)

**eAppendix 2.** Search strategy for EMBASE (using Embase.com)

**eReferences.**

This supplemental material has been provided by the authors to give readers additional information about their work.

**eTable 1. Characteristics of the Included Study Populations**

| PROM                                        | Ref         | Population |                          |                    | Disease characteristics |                               |                                                             | Instrumental Administration |             |          | Response rate |
|---------------------------------------------|-------------|------------|--------------------------|--------------------|-------------------------|-------------------------------|-------------------------------------------------------------|-----------------------------|-------------|----------|---------------|
|                                             |             | N          | Age mean (SD, range), yr | Gender (% females) | Disease                 | Disease Duration Mean (SD) yr | Disease Severity                                            | Setting                     | Country     | Language |               |
| Acne-Specific                               |             |            |                          |                    |                         |                               |                                                             |                             |             |          |               |
| <b>Acne Disability Index (ADI)</b>          | Motley 1989 | 100        | 22.8 (7.7, 12-55)        | 46%                | Acne                    | Not reported                  | Not reported                                                | Outpatient Clinic           | UK          | English  | Not reported  |
|                                             | Salek 1996  | 100        | Median 22 (15-51)        | 40%                | Acne                    | Not reported                  | Not reported                                                | Outpatient Clinic           | UK          | English  | Not reported  |
| <b>Cardiff Acne Disability Index (CADI)</b> | Motley 1992 | 66         | 21.5 (13-53)             | 39%                | Acne                    | Median 6 (1-39)               | Median IGA 1.5, 0.1, and 0.5 for the face, chest, and back. | Outpatient Clinic           | UK          | English  | Not reported  |
|                                             | Salek 1996  | 100        | Median 22 (15-51)        | 40%                | Acne                    | Not reported                  | Not reported                                                | Outpatient Clinic           | UK          | English  | Not reported  |
|                                             | Oakley 1996 | 104        | Median 18 (10-44)        | 52%                | Acne                    | Not reported                  | Median IGA 2, 0, and 1 for the face, chest, and back.       | Outpatient Clinic           | New Zealand | English  | 100%          |
|                                             | Dreno 2004  | 30         | 24 (13-53)               | 64%                | Acne                    | Not reported                  | Not reported                                                | Outpatient Clinic           | France      | French   | Not reported  |
|                                             | Walker 2006 | 147        | (15-18)                  | 46%                | Acne                    | Not reported                  | Not reported                                                | Cross-sectional survey      | Scotland    | English  | 89%           |
|                                             | Aghaei 2006 | 100        | 21 (3)                   | 85%                | Acne                    | Not reported                  | 16% mild, 78% moderate,                                     | Dermatology clinic          | Iran        | Persian  | Not reported  |

|                 |                  |     |                                |     |      |              |                                    |                               |               |         |              |
|-----------------|------------------|-----|--------------------------------|-----|------|--------------|------------------------------------|-------------------------------|---------------|---------|--------------|
|                 |                  |     |                                |     |      |              | and 6% severe                      |                               |               |         |              |
|                 | Law 2009         | 85  | 16 (2)                         | 71% | Acne | Not reported | 52% mild, 38% moderate, 11% severe | Two secondary schools         | China         | Chinese | 89%          |
|                 | Zaraa 2013       | 82  | 21.2 (4.1)                     | 73% | Acne | Not reported | 61% mild to moderate               | Dermatology clinic            | Tunesia       | French  | Not reported |
|                 | Jankovic 2013    | 353 | (15-18)                        | 36% | Acne | Not reported | Not reported                       | Secondary school students     | Serbian       | Serbian | Not reported |
|                 | Perić 2013       | 228 | 16.5 (0.5)                     | 82% | Acne | 49% >1 year  | Not reported                       | Two medical high schools      | Serbian       | Serbia  | Not reported |
|                 | Gupta 2015       | 100 | 22.5 (5.4, 14-45)              | 37% | Acne | Not reported | 44% mild, 42% moderate, 14% severe | Outpatient dermatology clinic | Hindi         | India   | Not reported |
|                 | Grando 2016      | 100 | 15.4 (2.1)                     | 44% | Acne | 2.5 (0.2)    | 58% mild, 36% moderate, 6% severe  | Outpatient dermatology clinic | Portuguese    | Brazil  | Not reported |
|                 | Kim 2017a        | 254 | Male: 16 (3)<br>Female: 17 (4) | 55% | Acne | Not reported | Not reported                       | Adolescents                   | Korea         | Korean  | Not reported |
|                 | Kim 2017b        | 107 | Male: 26 (4)<br>Female: 27 (5) | 22% | Acne | Not reported | Not reported                       | College students              | Korea         | Korean  | Not reported |
|                 | Alsulaimani 2020 | 45  | 90.1% were 18-24               | 82% | Acne | Not reported | Not reported                       | Outpatient dermatology clinic | Saudi Arabia  | Arabic  | Not reported |
| <b>Acne-QoL</b> | Martin 2001      | 111 | 19.0 (5.4)                     | 56% | Acne | 5.5 (4.6)    | 21% mild, 63% moderate, 16% severe | Outpatient dermatology clinic | United States | English | Not reported |

|                 |                |      |                        |              |                              |                                             |                                              |                                            |                                       |                      |              |
|-----------------|----------------|------|------------------------|--------------|------------------------------|---------------------------------------------|----------------------------------------------|--------------------------------------------|---------------------------------------|----------------------|--------------|
|                 | Fehnel 2002    | 450  | 24.1 (7.5)             | 100%         | Acne                         | Not reported                                | 73 lesions (mean)                            | Two trials of combined oral contraceptives | United States                         | English              | Not reported |
|                 | Kamamoto 2012  | 80   | 20.5 (4.8)             | 53%          | Acne                         | 6.6 (4.4)                                   | 34% mild, 36% moderate, 30% severe           | Dermatology clinic                         | Brazil                                | Brazilian Portuguese | Not reported |
|                 | Tan 2011       | 34   | 23 (14-53)             | 70%          | Acne                         | Not reported                                | Not reported                                 | Dermatology clinic                         | Canada, France                        | French               | Not reported |
|                 | Muvdi 2020     | 349  | 19.6 (4.6)             | 42%          | Acne                         | Not reported                                | 13% mild, 43% moderate, 44% severe           | Dermatology clinic                         | Columbia                              | Spanish              | 99.7%        |
|                 | Tan 2006       | 596  | 21.9 (7.7); 22.8 (8.0) | 58.0%        | Acne                         | 26% <2 years, 57% 2-10 years, 17% >10 years | 7% clear, 39% mild, 41% moderate, 13% severe | Survey                                     | Canada                                | English              | Not reported |
|                 | Saitta 2012    | 1192 | 19.3                   | 52.4%        | Acne                         | Not reported                                | 80.7% moderate, 19.3% severe                 | Clinical trial                             | United States                         | English              | Not reported |
|                 | Tan 2013       | 22   | Not reported           | Not reported | Acne                         | Not reported                                | Not reported                                 | Outpatient dermatology clinic              | Canada, France                        | French               | Not reported |
| <b>AcneQOLI</b> | Rapp 2006      | 479  | 23.3 (8.2)             | 64%          | Acne                         | 8.8 (7.4)                                   | Not reported                                 | Outpatient dermatology clinic              | United States                         | English              | Not reported |
| <b>CompAQ</b>   | McClellan 2018 | 234  | 20.3 (3.0)             | 85%          | Acne (85% face, 45% truncal) | Not reported                                | Not reported                                 | Outpatient dermatology clinic              | Canada, United States, United Kingdom | English              | Not reported |

|                                                                           |                     |     |                                                          |     |      |                |                                                                            |                               |                       |              |                                                                                                                                                     |
|---------------------------------------------------------------------------|---------------------|-----|----------------------------------------------------------|-----|------|----------------|----------------------------------------------------------------------------|-------------------------------|-----------------------|--------------|-----------------------------------------------------------------------------------------------------------------------------------------------------|
| <b>Acne Severity and Impact Scale (ASIS)</b>                              | Hudgens et al, 2015 | 150 | 24.5 (10.2)                                              | 59% | Acne | Not reported   | 29% mild, 59% moderate, 12% severe                                         | Outpatient                    | United States         | English      | >97%                                                                                                                                                |
| <b>Acne Quality of Life Scale (AQOL)</b>                                  | Gupta 1998          | 70  | 23.7 (6.8)                                               | 80% | Acne | Not reported   | Mean patient rated severity 4.7/10                                         | Outpatient dermatology clinic | United States         | English      | 70%                                                                                                                                                 |
|                                                                           | Ilgen 2005          | 108 | 20.4 (1.9)                                               | 62% | Acne | 1-156 months   | Global score (0-44): mean score 24.5 (8.1)                                 | Dermatology clinic            | Turkey                | Not reported | Not reported                                                                                                                                        |
| <b>Acne-Q</b>                                                             | Klassen 2019        | 256 | 23.1 (8.4)<br><br>12-19: 41%<br>20-29: 38%<br>30-52: 20% | 71% | Acne | Not reported   | 29% acne, 2% acne scars, 69% acne and scars. 64% face, 29% chest, 20% back | Dermatology clinic            | United States, Canada | English      | Acne scars 8.9%<br>Facial acne 2.5%<br>Chest acne 13.2%<br>Back acne 12.2%<br>Facial skin 5.0%<br>Symptoms 6.9%<br>Appearance-related distress 2.6% |
| <b>Assessment of the Psychological and Social Effects of Acne (APSEA)</b> | Zauli 2012          | 100 | 17.5 (11-25)                                             | 50% | Acne | 4.1 (0.5-13.0) | Mean Leeds grade 0.89 (0.2-3.8)                                            | Dermatology Clinic            | Italy                 | Not reported | Not reported                                                                                                                                        |

|                                                          |                     |     |                  |      |                    |               |                                    |                                |              |              |                                   |
|----------------------------------------------------------|---------------------|-----|------------------|------|--------------------|---------------|------------------------------------|--------------------------------|--------------|--------------|-----------------------------------|
| <b>Acne Impact on Adult Daily Life (AI-ADL)</b>          | Dreno 2021          | 207 | 22.1 (7.6)       | 68%  | Acne               | 7.3 (6.3)     | 38% mild, 42% moderate, 20% severe | 124 French Dermatology Clinics | France       | French       | Not reported                      |
| Dermatology-Specific                                     |                     |     |                  |      |                    |               |                                    |                                |              |              |                                   |
| <b>Dermatology Life Quality Index (DLQI)</b>             | Alsulaiman i 2020   | 45  | 90.1% were 18-24 | 82%  | Acne               | Not reported  | Not reported                       | Outpatient dermatology clinic  | Saudi Arabia | Arabic       | Not reported                      |
|                                                          | Newton 1997         | 79  | (16-39)          | 39%  | Acne               | Not reported  | Not reported                       | Dermatology department         | UK           | English      | 68% at 4 months, 67% at 12 months |
|                                                          | Klassen 2000        | 130 | 22.1 (5.2)       | 39%  | Acne               | Not reported  | 71% treated with isotretinoin      | Outpatient dermatology clinic  | UK           | English      | 85%                               |
|                                                          | Takahasi 2006       | 197 | 24.8 (7.4)       | 77%  | Acne               | Not reported  | Not reported                       | Outpatient dermatology clinic  | Japan        | Japanese     | Not reported                      |
|                                                          | Richter 2017        | 41  | 27.6 (5.3)       | 100% | Acne               | Not reported  | Mean ISGA 2.3 (0.55)               | Clinical trial of azelaic acid | Germany      | German       | Not reported                      |
| <b>Children's Dermatology Life Quality Index (CDLQI)</b> | Janković et al 2013 | 353 | 15-18 years old  | 36%  | Self-reported acne | Not reported  | Not reported                       | School                         | Slovenia     | Serbian      | Not reported                      |
|                                                          | Reljić et al 2014   | 199 | 16.5 (0.6)       | 84%  | Self-reported acne | 51.4% <1 year | 74% CDLQI <5, 19% 5-9, 7% >9       | School                         | Serbia       | Serbian      | 87.3%                             |
|                                                          | Tasoula et al 2012  | 491 | 15 (11-19)       | 51%  | Acne               | Not reported  | 71% mild, 29% moderate to severe   | School                         | Greece       | Not reported | Not reported                      |

|                                                                                      |                             |                                  |                    |              |                       |              |                                         |                                  |               |         |              |
|--------------------------------------------------------------------------------------|-----------------------------|----------------------------------|--------------------|--------------|-----------------------|--------------|-----------------------------------------|----------------------------------|---------------|---------|--------------|
| <b>DSQL</b>                                                                          | Anderson 1997               | 392                              | 20.1 (13.8-31.5)   | 53%          | Acne                  | Not reported | Not reported                            | Outpatient dermatology clinic    | United States | English | Not reported |
|                                                                                      | Anderson 1998               | 292                              | 20.7 (3.8, 16-30)  | 60%          | Acne                  | 6.6 (3.6)    | Mean total lesion count 85.5            | 6 outpatient dermatology clinics | United States | English | 93.3         |
| <b>Oily Skin Self Assessment Scale (OSSAS) and the Oily Skin Impact Scale (OSIS)</b> | Arbuckle 2009               | 196                              | 36.7 (12.1, 18-70) | 72%          | Oily skin, 64% acne   | Not reported | 48% mild, 41% moderate, 11% severe acne | Outpatient clinics               | United States | English | Not reported |
| <b>Skindex-29</b>                                                                    | Jones-Caballero et al, 2007 | 1892 (baseline) and 1613 (final) | 20.1               | 64%          | Mild to moderate acne | Not reported | Not reported                            | Outpatient clinics               | Spain         | Spanish | 95.5%        |
| Generic                                                                              |                             |                                  |                    |              |                       |              |                                         |                                  |               |         |              |
| <b>UKSIP</b>                                                                         | Salek 1996                  | 100                              | Median 22 (15-51)  | 40%          | Acne                  | Not reported | Not reported                            | Outpatient Clinic                | UK            | English | Not reported |
| <b>EQ-5D</b>                                                                         | Klassen 2000                | 130                              | 22.1 (5.2)         | 39%          | Acne                  | Not reported | 71% treated with isotretinoin           | Outpatient dermatology clinic    | UK            | English | 85%          |
| <b>SF-36</b>                                                                         | Klassen 2000                | 130                              | 22.1 (5.2)         | 39%          | Acne                  | Not reported | 71% treated with isotretinoin           | Outpatient dermatology clinic    | UK            | English | 85%          |
| <b>Patient Benefit Index (PBI)</b>                                                   | Augustin 2009               | 906                              | Not reported       | Not reported | Acne                  | Not reported | Not reported                            | Longitudinal clinical study      | Germany       | German  | Not reported |
| <b>PROMIS-Anxiety</b>                                                                | Esaa 2020                   | 527                              | 27 (10-72)         | 70%          | Acne                  | Not reported | Not reported                            | Outpatient dermatology clinic    | United States | English | Not reported |

**eTable 2. Results of Studies on Measurement Properties**

**ACNE SPECIFIC**

***Acne Disability Index (ADI)***

| ADI        | Country (language) in which the questionnaire was evaluated | Structural validity |           |                 | Internal Consistency |           |                         | Cross-cultural validity/measurement invariance |           |                 |
|------------|-------------------------------------------------------------|---------------------|-----------|-----------------|----------------------|-----------|-------------------------|------------------------------------------------|-----------|-----------------|
|            |                                                             | n                   | Meth Qual | Result (rating) | n                    | Meth Qual | Result (rating)         | n                                              | Meth Qual | Result (rating) |
| Salek 1996 | United Kingdom (English)                                    |                     |           |                 | 70                   | d         | Cronbach's alpha = 0.80 |                                                |           |                 |

| ADI        | Country (language) in which the questionnaire was evaluated | Reliability |           |                            | Measurement Error |           |                 | Criterion Validity |           |                 |
|------------|-------------------------------------------------------------|-------------|-----------|----------------------------|-------------------|-----------|-----------------|--------------------|-----------|-----------------|
|            |                                                             | n           | Meth Qual | Result (rating)            | n                 | Meth Qual | Result (rating) | n                  | Meth Qual | Result (rating) |
| Salek 1996 | United Kingdom (English)                                    | 70          | d         | Pearson correlation = 0.96 |                   |           |                 |                    |           |                 |

| ADI         | Country (language) in which the questionnaire was evaluated | Hypothesis Testing |           |                                                                                                                                      |  |  | Responsiveness |           |                 |
|-------------|-------------------------------------------------------------|--------------------|-----------|--------------------------------------------------------------------------------------------------------------------------------------|--|--|----------------|-----------|-----------------|
|             |                                                             | n                  | Meth Qual | Result (rating)                                                                                                                      |  |  | n              | Meth Qual | Result (rating) |
| Salek 1996  | United Kingdom (English)                                    | 100                | v         | Spearman correlation with acne clinical severity= 0.10; p>0.05                                                                       |  |  |                |           |                 |
| Salek 1996  | United Kingdom (English)                                    | 100                | v         | Pearson correlation with CADI = 0.48, p<0.01                                                                                         |  |  |                |           |                 |
| Motley 1989 | United Kingdom (English)                                    | 100                | i         | Correlation between acne severity and index total score for the face (r=0.246), chest (r=0.347), and back (r=0.436). p<0.01 for all. |  |  |                |           |                 |
| Motley 1989 | United Kingdom (English)                                    | 100                | i         | Correlation between amount of money patient is willing to pay to cure acne and acne index score                                      |  |  |                |           |                 |



|  |  |  |  |                |  |  |  |
|--|--|--|--|----------------|--|--|--|
|  |  |  |  | r=0.229 p<0.05 |  |  |  |
|--|--|--|--|----------------|--|--|--|

***Acne Impact on Adult Daily Life (AI-ADL)***

| AI-ADL     | Country (language) in which the questionnaire was evaluated | Structural validity |           |                                                                                     | Internal Consistency |           |                    | Cross-cultural validity/measurement invariance |           |                 |
|------------|-------------------------------------------------------------|---------------------|-----------|-------------------------------------------------------------------------------------|----------------------|-----------|--------------------|------------------------------------------------|-----------|-----------------|
|            |                                                             | n                   | Meth Qual | Result (rating)                                                                     | n                    | Meth Qual | Result (rating)    | n                                              | Meth Qual | Result (rating) |
| Dreno 2021 | French                                                      | 207                 | v         | One factor (Unidimensional): Eigen value ~8.3, TFI 0.998, CLI 0.998 and RMSEA 0.054 | 207                  | v         | Cronbach's a=0.949 |                                                |           |                 |

| AI-ADL     | Country (language) in which the questionnaire was evaluated | Reliability |           |                          | Measurement Error |           |                 | Criterion Validity |           |                 |
|------------|-------------------------------------------------------------|-------------|-----------|--------------------------|-------------------|-----------|-----------------|--------------------|-----------|-----------------|
|            |                                                             | n           | Meth Qual | Result (rating)          | n                 | Meth Qual | Result (rating) | n                  | Meth Qual | Result (rating) |
| Dreno 2021 |                                                             | 47          | d         | ICC= 0.992 [0.981;0.997] |                   |           |                 |                    |           |                 |

| AI-ADL     | Country (language) in which the questionnaire was evaluated | Hypothesis Testing |           |                                                                                                                                                                                                                                                                                                                                                                                                                                                                                                                                                                                                                                                                           | Responsiveness |           |                 |
|------------|-------------------------------------------------------------|--------------------|-----------|---------------------------------------------------------------------------------------------------------------------------------------------------------------------------------------------------------------------------------------------------------------------------------------------------------------------------------------------------------------------------------------------------------------------------------------------------------------------------------------------------------------------------------------------------------------------------------------------------------------------------------------------------------------------------|----------------|-----------|-----------------|
| AI-ADL     |                                                             | n                  | Meth Qual | Result (rating)                                                                                                                                                                                                                                                                                                                                                                                                                                                                                                                                                                                                                                                           | n              | Meth Qual | Result (rating) |
| Dreno 2021 |                                                             | 207                | a         | <p><i>9a. comparison with another instrument: Convergent validity:</i><br/> Spearman R<br/> SF-12 physical score 0.084 (-0.053;0.218)<br/> p=0.228<br/> SF-12 mental score<br/> -0.558 [-0.645;-0.457] p&lt;0.001<br/> CADI score 0.757 [0.692; 0.81] p&lt;0.001</p> <p><i>9b. Known groups comparison: Acne severity</i><br/> Kruskal–Wallis test confirmed the statistically significant (P &lt; 0.001) difference of AI-ADL scores among the different acne severity according to the GEA. The more severe acne, the higher was the AI-ADL score (mean AI-ADL scores for: mild acne 19.06 +/- 13.36, moderate acne: 27.25 +/-16.09 and severe acne: 35.36+/-16.67)</p> |                |           |                 |

### *Acne Severity and Impact Scale (ASIS)*

| ASIS                  | Country (language) in which the questionnaire was evaluated | Structural validity |           |                                                                                                                                                                                                                                                                                                                                  | Internal Consistency |           |                                                                                                                                                                        | Cross-cultural validity/measurement invariance |           |                                                                                           |
|-----------------------|-------------------------------------------------------------|---------------------|-----------|----------------------------------------------------------------------------------------------------------------------------------------------------------------------------------------------------------------------------------------------------------------------------------------------------------------------------------|----------------------|-----------|------------------------------------------------------------------------------------------------------------------------------------------------------------------------|------------------------------------------------|-----------|-------------------------------------------------------------------------------------------|
|                       |                                                             | n                   | Meth Qual | Result (rating)                                                                                                                                                                                                                                                                                                                  | n                    | Meth Qual | Result (rating)                                                                                                                                                        | n                                              | Meth Qual | Result (rating)                                                                           |
| Hudgens 2015 (Sign)   | United States (English)                                     | 150                 | a         | <p><b>Unidimensionality:</b><br/>Sign domain performed below the recommender minimum criterial</p> <p><b>Local independence:</b><br/>All items fulfilled criteria independence (item residual correlation &lt;0.4)</p> <p><b>Item fit:</b><br/>Infit and outfit mean squares <math>\geq 0.5</math> and <math>\leq 1.5</math></p> | 150                  | v         | <p>Cronbach's alpha = 0.79</p> <p>IRT (subject/person) Reliability = 0.72</p> <p>Separation = 1.61</p> <p>IRT (Item) Reliability = 0.93</p> <p>Sepearation = 3.60</p>  | Caucasians = 89<br>Non-Caucasians = 61         | i         | None of the items demonstrated significant variable between Caucasians and non-Caucasians |
| Hudgens 2015 (Impact) | United States (English)                                     | 150                 | a         | <p><b>Unidimensionality:</b><br/>Item residuals in the impact domain had acceptable explained variance (&gt;60%) and unexplained in 1<sup>st</sup> contrast (5.5%)</p> <p><b>Local independence:</b><br/>All items fulfilled criteria independence (item residual correlation &lt;0.4)</p> <p><b>Item fit:</b></p>               | 150                  | v         | <p>Cronbach's alpha = 0.77</p> <p>IRT (subject/person) Reliability = 0.93</p> <p>Separation = 3.69</p> <p>IRT (Item) Reliability = 0.99</p> <p>Sepearation = 11.74</p> | Caucasians = 89<br>Non-Caucasians = 61         | i         | None of the items demonstrated significant variable between Caucasians and non-Caucasians |

|                                   |                         |     |   |                                                                                      |     |   |                         |                                        |   |               |
|-----------------------------------|-------------------------|-----|---|--------------------------------------------------------------------------------------|-----|---|-------------------------|----------------------------------------|---|---------------|
|                                   |                         |     |   | Infit and outfit mean squares $\geq 0.5$ and $\leq 1.5$ , except for items 10 and 11 |     |   |                         |                                        |   |               |
| Hudgens 2015 (Impact - Emotional) | United States (English) | 150 | i | Results not given                                                                    | 150 | v | Cronbach's alpha = 0.92 | Caucasians = 89<br>Non-Caucasians = 61 | i | No data given |
| Hudgens 2015 (Impact - Social)    | United States (English) | 150 | i | Results not given                                                                    | 150 | v | Cronbach's alpha = 0.92 | Caucasians = 89<br>Non-Caucasians = 61 | i |               |

| PROM                              | Country (language) in which the questionnaire was evaluated | Reliability |           |                 | Measurement Error |           |                 | Criterion Validity |           |                 |
|-----------------------------------|-------------------------------------------------------------|-------------|-----------|-----------------|-------------------|-----------|-----------------|--------------------|-----------|-----------------|
|                                   |                                                             | n           | Meth Qual | Result (rating) | n                 | Meth Qual | Result (rating) | n                  | Meth Qual | Result (rating) |
| Hudgens 2015 (Sign)               | United States (English)                                     | 150         | a         | ICC = 0.78      |                   |           |                 |                    |           |                 |
| Hudgens 2015 (Impact)             | United States (English)                                     | 150         | a         | ICC = 0.77      |                   |           |                 |                    |           |                 |
| Hudgens 2015 (Impact - Emotional) | United States (English)                                     | 150         | a         | ICC = 0.76      |                   |           |                 |                    |           |                 |
| Hudgens 2015 (Impact - Social)    | United States (English)                                     | 150         | a         | ICC = 0.58      |                   |           |                 |                    |           |                 |

| PROM | Country (language) in which the questionnaire was evaluated | Hypothesis Testing |           |                 |  | Responsiveness |           |                 |
|------|-------------------------------------------------------------|--------------------|-----------|-----------------|--|----------------|-----------|-----------------|
|      |                                                             | n                  | Meth Qual | Result (rating) |  | n              | Meth Qual | Result (rating) |
|      |                                                             |                    |           |                 |  |                |           |                 |

|                       |                         |     |   |                                                                                                                                                           |  |  |  |
|-----------------------|-------------------------|-----|---|-----------------------------------------------------------------------------------------------------------------------------------------------------------|--|--|--|
| Hudgens 2015 (Sign)   | United States (English) | 150 | a | Acne-QoL: self-perception (r=-0.50), role-social (r=-0.42), role emotional (r=-0.51), acne symptoms (4=-0.68)                                             |  |  |  |
| Hudgens 2015 (Impact) | United States (English) | 150 | a | Acne-QoL: self-perception (r=-0.81), role-social (r=-0.67), role emotional (r=-0.78), acne symptoms (4=-0.63)                                             |  |  |  |
| Hudgens 2015 (Sign)   | United States (English) | 150 | a | DSQL: Work/school performance (r=0.30), self perception (r=0.49)                                                                                          |  |  |  |
| Hudgens 2015 (Impact) | United States (English) | 150 | a | DSQL: Work/school performance (r=-0.59), self perception (r=-0.82)                                                                                        |  |  |  |
| Hudgens 2015 (Sign)   | United States (English) | 150 | a | Skindex-29: functioning (r=0.48)                                                                                                                          |  |  |  |
| Hudgens 2015 (Impact) | United States (English) | 150 | a | Skindex-29: functioning (r=0.76)                                                                                                                          |  |  |  |
| Hudgens 2015 (Sign)   | United States (English) | 150 | a | Significant differences in mean sign ASIS scores by DSQL severity score (p<0.001) very mild = 1.2 (0.42), moderate = 1.7 (0.61), very severe = 2.2 (0.50) |  |  |  |
| Hudgens 2015 (Impact) | United States (English) | 150 | a | DSQL severity score (p<0.001) very mild = 1.1 (0.55), moderate = 1.7 (0.80), very severe = 2.2 (0.66)                                                     |  |  |  |

**Acne-Q**

| Acne-Q       | Country (language) in which the questionnaire was evaluated | Structural validity |           |                                                                                                                                                                                                                                                                                                                                                                                                                                                      | Internal Consistency                                                 |           |                                                                                                                                                                                                                        | Cross-cultural validity/measurement invariance |           |                 |
|--------------|-------------------------------------------------------------|---------------------|-----------|------------------------------------------------------------------------------------------------------------------------------------------------------------------------------------------------------------------------------------------------------------------------------------------------------------------------------------------------------------------------------------------------------------------------------------------------------|----------------------------------------------------------------------|-----------|------------------------------------------------------------------------------------------------------------------------------------------------------------------------------------------------------------------------|------------------------------------------------|-----------|-----------------|
|              |                                                             | n                   | Meth Qual | Result (rating)                                                                                                                                                                                                                                                                                                                                                                                                                                      | n                                                                    | Meth Qual | Result (rating)                                                                                                                                                                                                        | n                                              | Meth Qual | Result (rating) |
| Klassen 2019 | United States and Canada (English)                          | 256                 | a         | <p><u>Monotonicity:</u><br/>All items had ordered response thresholds</p> <p><u>Model fit:</u><br/>The data fit the Rasch model with nonsignificant chi2-values for the five appearance scales, with some misfit for the symptoms and appearance-related distress.</p> <p>Item fit was within -2.5 to +2.5 for 63 of 73 items and all items had non-significant chi2.</p> <p>Unidimensionality and local independence not specifically described</p> | Per scale in order:<br>194<br>276<br>112<br>144<br>288<br>273<br>295 | v         | <p>Cronbach's <math>\alpha</math></p> <p>Acne scars 0.96</p> <p>Facial acne 0.96</p> <p>Chest acne 0.95</p> <p>Back acne 0.97</p> <p>Facial skin 0.96</p> <p>Symptoms 0.87</p> <p>Appearance-related distress 0.94</p> |                                                |           |                 |

| Acne-Q       | Country (language) in which the questionnaire was evaluated | Reliability                                                   |           |                                                                                                                                                                                                                                                                                                                                                                                                                | Measurement Error |           |                 | Criterion Validity |           |                 |
|--------------|-------------------------------------------------------------|---------------------------------------------------------------|-----------|----------------------------------------------------------------------------------------------------------------------------------------------------------------------------------------------------------------------------------------------------------------------------------------------------------------------------------------------------------------------------------------------------------------|-------------------|-----------|-----------------|--------------------|-----------|-----------------|
|              |                                                             | n                                                             | Meth Qual | Result (rating)                                                                                                                                                                                                                                                                                                                                                                                                | n                 | Meth Qual | Result (rating) | n                  | Meth Qual | Result (rating) |
| Klassen 2019 | United States and Canada (English)                          | Per scale in order:<br>25<br>34<br>13<br>17<br>36<br>32<br>36 | d         | ICC<br>Acne scars 0.87<br>Facial acne 0.94<br>Chest acne 0.56<br>Back acne 0.95<br>Facial skin 0.81<br>Symptoms 0.88<br>Appearance-related distress 0.93<br><br>Person separation index with, without extremes:<br>Acne scars 0.94, 0.93<br>Facial acne 0.94, 0.94<br>Chest acne 0.92, 0.91<br>Back acne 0.95, 0.94<br>Facial skin 0.93, 0.92<br>Symptoms 0.77, 0.75<br>Appearance-related distress 0.88, 0.94 |                   |           |                 |                    |           |                 |

| Acne-Q | Country (language) in which the questionnaire was evaluated | Hypothesis Testing | Responsiveness |
|--------|-------------------------------------------------------------|--------------------|----------------|
|        |                                                             |                    |                |



|              |                                    | n                               | Meth Qual | Result (rating)                                                                                                                                                                                                                                                                                                                                                                                                                                                                                                                                                                         | n | Meth Qual | Result (rating) |
|--------------|------------------------------------|---------------------------------|-----------|-----------------------------------------------------------------------------------------------------------------------------------------------------------------------------------------------------------------------------------------------------------------------------------------------------------------------------------------------------------------------------------------------------------------------------------------------------------------------------------------------------------------------------------------------------------------------------------------|---|-----------|-----------------|
| Klassen 2019 | United States and Canada (English) | 112-288 depending on comparison | d         | Correlation r<br>Intercorrelation between scales:<br><i>Acne scars scale:</i><br>Facial acne 0.77<br>p=0.01<br>Back acne 0.45<br>p=0.01<br>Chest acne 0.54<br>p=0.01<br>Facial skin 0.40<br>p=0.01<br>Symptoms 0.51<br>p=0.01<br>Appearance-related distress -0.61<br>p=0.01<br><i>Facial acne scale:</i><br>Back acne 0.29<br>p=0.01<br>Chest acne 0.43<br>p=0.01<br>Facial skin 0.51<br>p=0.01<br>Symptoms 0.62 p=0.01<br>Appearance related distress -0.59<br>p=0.01<br><i>Back acne scale:</i><br>Chest acne 0.58<br>p=0.02<br>Facial skin 0.19<br>p=.05<br>Symptoms 0.38<br>p=0.01 |   |           |                 |

|  |  |  |                                                                                                                                                                                                                                                                                                                                                                                                                                                                                                                                                                                                                                                                                                                                                          |  |  |  |
|--|--|--|----------------------------------------------------------------------------------------------------------------------------------------------------------------------------------------------------------------------------------------------------------------------------------------------------------------------------------------------------------------------------------------------------------------------------------------------------------------------------------------------------------------------------------------------------------------------------------------------------------------------------------------------------------------------------------------------------------------------------------------------------------|--|--|--|
|  |  |  | <p>Appearance-related distress -0.31<br/>p=0.01</p> <p><i>Chest acne scale:</i><br/>Symptoms 0.45<br/>p=0.01</p> <p>Appearance-related distress -0.36<br/>p=0.01</p> <p><i>Facial skin scale:</i><br/>Symptoms 0.36<br/>p=0.01</p> <p>Appearance related distress -0.45<br/>p=0.01</p> <p><i>Symptoms scale:</i><br/>Appearance related distress -0.50<br/>p=0.01</p> <p>Correlation with clinical data and demographics:</p> <p><i>Acne scars scale:</i><br/>Coverage facial acne scars -0.30<br/>p=0.01</p> <p><i>Facial acne scale:</i><br/>Coverage facial acne -0.24 p=0.01<br/>Coverage facial acne scars -0.30<br/>p=0.01</p> <p><i>Back acne scale:</i><br/>Female Sex -0.20<br/>p=0.05</p> <p><i>Chest acne scale:</i><br/>None significant</p> |  |  |  |
|--|--|--|----------------------------------------------------------------------------------------------------------------------------------------------------------------------------------------------------------------------------------------------------------------------------------------------------------------------------------------------------------------------------------------------------------------------------------------------------------------------------------------------------------------------------------------------------------------------------------------------------------------------------------------------------------------------------------------------------------------------------------------------------------|--|--|--|

|  |  |  |                                                                                                                                                                                                                                                                                                                                                                                                            |  |  |  |
|--|--|--|------------------------------------------------------------------------------------------------------------------------------------------------------------------------------------------------------------------------------------------------------------------------------------------------------------------------------------------------------------------------------------------------------------|--|--|--|
|  |  |  | <i>Facial skin scale:</i><br>Coverage facial<br>acne -0.23 p=0.01<br>Coverage facial<br>acne scars -0.23<br>p=0.01<br><i>Symptom scale:</i><br>Coverage facial<br>acne -0.17 p=0.01<br>Coverage facial<br>acne scars -0.25<br>p=0.01<br><i>Appearance-related<br/> distress scale:</i><br>Coverage facial<br>acne 0.16 p=0.01<br>Coverage facial<br>acne scars 0.28<br>p=0.01<br>Female Sex 0.15<br>p=0.05 |  |  |  |
|--|--|--|------------------------------------------------------------------------------------------------------------------------------------------------------------------------------------------------------------------------------------------------------------------------------------------------------------------------------------------------------------------------------------------------------------|--|--|--|

### *Acne Quality of Life Index (Acne-QOLI)*

| Acne-QOLI | Country (language) in which the questionnaire was evaluated | Structural validity |           |                         | Internal Consistency |           |                                                   | Cross-cultural validity/measurement invariance |           |                 |
|-----------|-------------------------------------------------------------|---------------------|-----------|-------------------------|----------------------|-----------|---------------------------------------------------|------------------------------------------------|-----------|-----------------|
|           |                                                             | n                   | Meth Qual | Result (rating)         | n                    | Meth Qual | Result (rating)                                   | n                                              | Meth Qual | Result (rating) |
| Rapp 2006 | United States (English)                                     | 479                 | d         | “yielded single factor” | 479                  | v         | Cronbach’s alpha = 0.97 (>0.91 for each subscale) |                                                |           |                 |

| Acne-QOLI | Country (language) in which the questionnaire was evaluated | Reliability |           |                                                          | Measurement Error |           |                 | Criterion Validity |           |                 |
|-----------|-------------------------------------------------------------|-------------|-----------|----------------------------------------------------------|-------------------|-----------|-----------------|--------------------|-----------|-----------------|
|           |                                                             | n           | Meth Qual | Result (rating)                                          | n                 | Meth Qual | Result (rating) | n                  | Meth Qual | Result (rating) |
| Rapp 2006 | United States (English)                                     | 10          | d         | Pearson correlation r=0.86<br>Spearman rank-order r=0.71 |                   |           |                 |                    |           |                 |

| Acne-QOLI | Country (language) in which the questionnaire was evaluated | Hypothesis Testing |           |                                                                                                                         | Responsiveness |           |                 |
|-----------|-------------------------------------------------------------|--------------------|-----------|-------------------------------------------------------------------------------------------------------------------------|----------------|-----------|-----------------|
|           |                                                             | n                  | Meth Qual | Result (rating)                                                                                                         | n              | Meth Qual | Result (rating) |
| Rapp 2006 | United States (English)                                     | 479                | a         | Correlation with:<br>Skindex-16:<br>r=-0.79<br>Perceived Stress Scale:<br>r=-0.28<br>Profile of Mood States:<br>r=-0.39 |                |           |                 |
| Rapp 2006 | United States (English)                                     | 479                | i         | Correlation with:<br>Acne severity:<br>r=-0.51<br>Generic QoL: r=0.32                                                   |                |           |                 |

### *Acne Quality of Life Scale (Acne QOLS)*

| Acne QOLS  | Country (language) in which the questionnaire was evaluated | Structural validity |           |                                                                                                                  | Internal Consistency |           |                                                                                                                                           | Cross-cultural validity/measurement invariance |           |                 |
|------------|-------------------------------------------------------------|---------------------|-----------|------------------------------------------------------------------------------------------------------------------|----------------------|-----------|-------------------------------------------------------------------------------------------------------------------------------------------|------------------------------------------------|-----------|-----------------|
|            |                                                             | n                   | Meth Qual | Result (rating)                                                                                                  | n                    | Meth Qual | Result (rating)                                                                                                                           | n                                              | Meth Qual | Result (rating) |
| Ilgen 2005 | Turkey (Not reported)                                       |                     |           |                                                                                                                  | 100                  | v         | Cronbach's alpha: 0.87                                                                                                                    |                                                |           |                 |
| Gupta 1998 | United States (English)                                     | 70                  | d         | Exploratory factor analysis: 2 factors identified: Social (57.8% of variance) and vocational (11.4% of variance) | 70                   | v         | Cronbach's alpha:<br>TotalQoL (12 items) =0.91<br>SOCQOL (9 items)= 0.94<br>VOCQOL (3 items) = 0.83<br>(NB: final version of AQOL=SOCQOL) |                                                |           |                 |

| Acne QOLS  | Country (language) in which the questionnaire was evaluated | Reliability |           |                                                        | Measurement Error |           |                 | Criterion Validity |           |                 |
|------------|-------------------------------------------------------------|-------------|-----------|--------------------------------------------------------|-------------------|-----------|-----------------|--------------------|-----------|-----------------|
|            |                                                             | n           | Meth Qual | Result (rating)                                        | n                 | Meth Qual | Result (rating) | n                  | Meth Qual | Result (rating) |
| Gupta 1998 | United States (English)                                     | 64          | d         | Pearson r<br>TOTQOL 0.98<br>SOCQOL 0.99<br>VOCQOL 0.97 |                   |           |                 |                    |           |                 |

| Acne QOLS | Country (language) in which the questionnaire was evaluated | Hypothesis Testing |           |                 |  |  | Responsiveness |           |                 |
|-----------|-------------------------------------------------------------|--------------------|-----------|-----------------|--|--|----------------|-----------|-----------------|
|           |                                                             | n                  | Meth Qual | Result (rating) |  |  | n              | Meth Qual | Result (rating) |
|           |                                                             |                    |           |                 |  |  |                |           |                 |

|            |                         |     |   |                                                                                                                                                                                                                                                                                                                                                                                                                                                                                                                                                                                                       |  |  |  |
|------------|-------------------------|-----|---|-------------------------------------------------------------------------------------------------------------------------------------------------------------------------------------------------------------------------------------------------------------------------------------------------------------------------------------------------------------------------------------------------------------------------------------------------------------------------------------------------------------------------------------------------------------------------------------------------------|--|--|--|
| Ilgen 2005 | Turkey (Not reported)   | 108 | d | <p>Convergent validity with DLQI Spearman:<br/>R=0.466 p&lt;0.05</p> <p>Known groups: Acne vs control:<br/>Statistically, AQOLS (p=0.001) and DLQI (p=0.000) scores of the patients with acne were found to be significantly higher as compared to the control group (statistical test not stated)</p> <p>Known groups<br/>Acne severity:<br/>No correlation between AQOLS or DLQI and acne severity</p>                                                                                                                                                                                              |  |  |  |
| Gupta 1998 | United States (English) | 70  | d | <p>Convergent validity Pearson r</p> <p><i>TOTQOL</i>:<br/>BSI r&gt;0.35 p&lt;0.05<br/>CRDS r=0.44 p=0.01<br/>IDS r=-0.50 p=0.006<br/>Rosenberg's Self esteem r=0.42 p=0.01</p> <p><i>SOCQOL</i>:<br/>BSI r&gt;0.3 p&lt;0.05<br/>CRDS r=0.31 p=0.03<br/>IDS r=-0.36 p=0.003<br/>Self esteem r=0.42 p=0.009</p> <p><i>VOCQOL</i>:<br/>BSI r&gt;0.4 p&lt;0.05<br/>CRDS r=0.62 p=0.01<br/>IDS r=-0.32 p=0.04<br/>Self esteem r=0.33 p=0.01</p> <p>Known groups<br/>Acne severity indices:<br/>TOTQOL and VOCQOL no correlations<br/>SOCQOL:<br/>Pustules r=0.34 p=0.006<br/>Scarring r= 0.39 p=0.002</p> |  |  |  |

BSI: Brief Symptom Inventory; IDS: Interpersonal Dependency Inventory; CRSD: Carroll Rating Scale for Depression

## Acne-QoL

| Acne QoL    | Country (language) in which the questionnaire was evaluated | Structural validity |           |                                                                                                                                                                                                                                                                                                                 | Internal Consistency |           |                                                                                                                                                                                                       | Cross-cultural validity/measurement invariance |           |                 |
|-------------|-------------------------------------------------------------|---------------------|-----------|-----------------------------------------------------------------------------------------------------------------------------------------------------------------------------------------------------------------------------------------------------------------------------------------------------------------|----------------------|-----------|-------------------------------------------------------------------------------------------------------------------------------------------------------------------------------------------------------|------------------------------------------------|-----------|-----------------|
|             |                                                             | n                   | Meth Qual | Result (rating)                                                                                                                                                                                                                                                                                                 | n                    | Meth Qual | Result (rating)                                                                                                                                                                                       | n                                              | Meth Qual | Result (rating) |
| Martin 2001 | USA (English)                                               |                     |           |                                                                                                                                                                                                                                                                                                                 | 111                  | i         | Initial scores too high; Scores not reported after 5 items dropped due to redundancy                                                                                                                  |                                                |           |                 |
| Fehnel 2002 | USA (English)                                               | 450                 | v         | The majority of the items produced high factor loadings, suggesting that they fit well within their subscales, Values for the goodness-of-fit indices provide further evidence of appropriate model fit: 0.98 (GFI), 0.97 (AGFI), and 0.99 (CFI). The Root Mean Square Error of Approximation (RMSEA) was 0.07. | 450                  | d         | Cronbach's alpha ranged from 0.87 to 0.96 for the Self-Perception, Role-Emo-tional, and Role-Social subscales. Estimates for the Acne Symptoms subscale ranged from 0.77–0.86 across study timepoints |                                                |           |                 |

| Acne QoL | Country (language) in which the questionnaire was evaluated | Reliability | Measurement Error | Criterion Validity |
|----------|-------------------------------------------------------------|-------------|-------------------|--------------------|
|----------|-------------------------------------------------------------|-------------|-------------------|--------------------|



|                      |               | n   | Meth Qual | Result (rating)                                                                     | n | Meth Qual | Result (rating) | n   | Meth Qual | Result (rating)                               |
|----------------------|---------------|-----|-----------|-------------------------------------------------------------------------------------|---|-----------|-----------------|-----|-----------|-----------------------------------------------|
| Acne-QoL Martin 2001 | USA (English) | 111 | a         | ICC and CCC ranged 0.84-0.90 among domain scores; ranged from 0.50-0.70 among items |   |           |                 | 111 | i         | Cronbach's alpha calculated but not presented |

| Acne QoL             | Country (language) in which the questionnaire was evaluated | Hypothesis Testing |           |                                                                                                                                                                                                                                                                                                                                         | Responsiveness |           |                                                                                                                                                                                                                                                                                                                                                                                                                          |
|----------------------|-------------------------------------------------------------|--------------------|-----------|-----------------------------------------------------------------------------------------------------------------------------------------------------------------------------------------------------------------------------------------------------------------------------------------------------------------------------------------|----------------|-----------|--------------------------------------------------------------------------------------------------------------------------------------------------------------------------------------------------------------------------------------------------------------------------------------------------------------------------------------------------------------------------------------------------------------------------|
|                      |                                                             | n                  | Meth Qual | Result (rating)                                                                                                                                                                                                                                                                                                                         | n              | Meth Qual | Result (rating)                                                                                                                                                                                                                                                                                                                                                                                                          |
| Acne-QoL Martin 2001 |                                                             | 92                 | i         | Known groups validity demonstrates worsening QoL scores with worsening severity (stats not reported)                                                                                                                                                                                                                                    | 92             | i         | Improvements in scores following treatment with isotretinoin (stats not reported)                                                                                                                                                                                                                                                                                                                                        |
|                      |                                                             | 92                 | i         | Improvement in lesion count was moderately to highly correlated with improvements in QoL scores (data not shown)                                                                                                                                                                                                                        |                |           |                                                                                                                                                                                                                                                                                                                                                                                                                          |
| Fehnel               | USA (English)                                               | 450                | a         | <b>Convergent validity</b> correlation with physician acne assessments:<br><i>Lesion counts:</i><br><i>End of study</i><br>Self-Perception -0.3*<br>Role-Emotional -0.29*<br>Role-Social -0.25*<br>Acne Symptoms -0.35*<br><i>Physician Global Assessment</i><br><i>End of study</i><br>Self-Perception -0.36*<br>Role-Emotional -0.37* | 231            | v         | Guyatt's responsiveness statistic (effect size)<br><i>Baseline to end of treatment (6 mos):</i><br>Self perception 0.41<br>Role Emotional 0.49<br>Role Social 0.44<br>Acne Symptoms 0.49<br><br>In a series of repeated measures ANOVAs, statistically significant interactions between visit (base-line, mid-study, and last) and treatment group (Estrostep vs. placebo) were observed for all subscales (p < 0:0001). |

|  |  |  |  |                                                                                                                                                                                                                                                                            |  |  |  |
|--|--|--|--|----------------------------------------------------------------------------------------------------------------------------------------------------------------------------------------------------------------------------------------------------------------------------|--|--|--|
|  |  |  |  | Role-Social<br>-0.32*<br>Acne Symptoms<br>-0.44*<br><br><b>Discriminate validity</b> (lack of<br>correlation with unrelated<br>measures)<br><i>End of treatment</i><br>Blood pressure<br>.03, .06, .06, .09<br>HR<br>-.07, -.07, -.03, -.01<br>Height<br>.1, .14, .12, .07 |  |  |  |
|--|--|--|--|----------------------------------------------------------------------------------------------------------------------------------------------------------------------------------------------------------------------------------------------------------------------------|--|--|--|

| Acne QoL      | Country (language) in which the questionnaire was evaluated | Structural validity |           |                 | Internal Consistency |           |                                                                                                                                     | Cross-cultural validity/measurement invariance |           |                 |
|---------------|-------------------------------------------------------------|---------------------|-----------|-----------------|----------------------|-----------|-------------------------------------------------------------------------------------------------------------------------------------|------------------------------------------------|-----------|-----------------|
|               |                                                             | n                   | Meth Qual | Result (rating) | n                    | Meth Qual | Result (rating)                                                                                                                     | n                                              | Meth Qual | Result (rating) |
| Kamamoto 2012 | Brazilian Portuguese                                        |                     |           |                 | 80                   | v         | Total score<br>a=0.925<br>Self-perception<br>a=.852<br>Role social<br>a=.879<br>Role emotional<br>a=.764<br>Acne symptoms<br>a=.692 |                                                |           |                 |

| Acne QoL      | Country (language) in which the questionnaire was evaluated | Reliability |           |                                                                                                                   | Measurement Error |           |                 | Criterion Validity |           |                 |
|---------------|-------------------------------------------------------------|-------------|-----------|-------------------------------------------------------------------------------------------------------------------|-------------------|-----------|-----------------|--------------------|-----------|-----------------|
|               |                                                             | n           | Meth Qual | Result (rating)                                                                                                   | n                 | Meth Qual | Result (rating) | n                  | Meth Qual | Result (rating) |
| Kamamoto 2012 | Brazilian Portuguese                                        | 42          | a         | Self-perception<br>ICC=.836<br>Role social<br>ICC=.782<br>Role emotional<br>ICC=.795<br>Acne symptoms<br>ICC=.768 |                   |           |                 |                    |           |                 |

| Acne QoL      | Country (language) in which the questionnaire was evaluated | Hypothesis Testing |           |                                                                                                                                 |  |  |   | Responsiveness |                 |  |
|---------------|-------------------------------------------------------------|--------------------|-----------|---------------------------------------------------------------------------------------------------------------------------------|--|--|---|----------------|-----------------|--|
|               |                                                             | n                  | Meth Qual | Result (rating)                                                                                                                 |  |  | n | Meth Qual      | Result (rating) |  |
| Kamamoto 2012 | Brazilian Portuguese                                        | 80                 | a         | Known groups validity with acne severity: Mild acne had higher role-social scores than moderate acne (p=0.040). No associations |  |  |   |                |                 |  |

|               |                      |    |   |                                                                                                                                                                                                                                                                                                                                                                                                                                                                                                                   |  |  |  |
|---------------|----------------------|----|---|-------------------------------------------------------------------------------------------------------------------------------------------------------------------------------------------------------------------------------------------------------------------------------------------------------------------------------------------------------------------------------------------------------------------------------------------------------------------------------------------------------------------|--|--|--|
|               |                      |    |   | were noted for self-perception (p=0.168), role-emotional (p=0.908), or acne symptoms (p=0.584).                                                                                                                                                                                                                                                                                                                                                                                                                   |  |  |  |
| Kamamoto 2012 | Brazilian Portuguese | 80 | a | <p>Convergent validity with SF36 physical functioning domain and AcneQol domains:</p> <ul style="list-style-type: none"> <li>-Self-perception: 0.186</li> <li>-Role social: 0.106</li> <li>-Role emotional: -0.017</li> <li>-Acne symptoms: 0.082</li> </ul> <p>Convergent validity with SF36 mental health domain and AcneQol domains:</p> <ul style="list-style-type: none"> <li>-Self-perception: 0.265</li> <li>-Role social: 0.235</li> <li>-Role emotional: 0.183</li> <li>-Acne symptoms: 0.056</li> </ul> |  |  |  |

| Acne QoL | Country (language) in which the questionnaire was evaluated | Reliability |           |                                                                                                                                                                                                 | Measurement Error |           |                 | Criterion Validity |           |                 |
|----------|-------------------------------------------------------------|-------------|-----------|-------------------------------------------------------------------------------------------------------------------------------------------------------------------------------------------------|-------------------|-----------|-----------------|--------------------|-----------|-----------------|
|          |                                                             | n           | Meth Qual | Result (rating)                                                                                                                                                                                 | n                 | Meth Qual | Result (rating) | n                  | Meth Qual | Result (rating) |
| Tan 2011 | French (Canada and France)                                  | 14          | a         | Pearson r (day 0, day 2-3):<br>AcneQoL total score 0.77 (p<.001)<br>Self Perception 0.75 (p<.002)<br>Role Social 0.69 (p<.006)<br>Role Emotional 0.66 (p=.01)<br>Acne Symptoms 0.85 (p= p<.001) |                   |           |                 |                    |           |                 |

| Acne QoL | Country (language) in which the questionnaire was evaluated | Hypothesis Testing |           |                 | Responsiveness |           |                                                                                                                                                                                                                                                                                                                                    |
|----------|-------------------------------------------------------------|--------------------|-----------|-----------------|----------------|-----------|------------------------------------------------------------------------------------------------------------------------------------------------------------------------------------------------------------------------------------------------------------------------------------------------------------------------------------|
|          |                                                             | n                  | Meth Qual | Result (rating) | n              | Meth Qual | Result (rating)                                                                                                                                                                                                                                                                                                                    |
| Tan 2011 | French (Canada and France)                                  |                    |           |                 | 19             | d         | Mean score difference (SD):<br>AcneQoL total score 19.7 (23.5) p= .002<br>Self Perception 8.3 (7.9) p<0.001<br>Role Social 2.6 (5.5) p=.056<br>Role Emotional 4.3 (6.8) p=.013<br>Acne Symptoms 4.5 (5.9) p=.004<br><br>Comparison with CADIFr: Mean score difference in CADI total score was -1.9 (p=.01) indicating improved QoL |

| Acne QoL   | Country (language) in which the questionnaire was evaluated | Structural validity |           |                                                                                                                                                                                            | Internal Consistency |           |                                                                                           | Cross-cultural validity/measurement invariance |           |                 |
|------------|-------------------------------------------------------------|---------------------|-----------|--------------------------------------------------------------------------------------------------------------------------------------------------------------------------------------------|----------------------|-----------|-------------------------------------------------------------------------------------------|------------------------------------------------|-----------|-----------------|
|            |                                                             | n                   | Meth Qual | Result (rating)                                                                                                                                                                            | n                    | Meth Qual | Result (rating)                                                                           | n                                              | Meth Qual | Result (rating) |
| Muvdi 2020 | Colombia (Spanish)                                          | 349                 | v         | EFA revealed a 3 factor structure:<br>Self perception + Role social (8 items)<br>Role emotional (4 items)<br>Acne symptoms (3 items); 4 items were eliminated based on the factor analysis | 349                  | v         | Self-perception a=.86<br>Role social a=.90<br>Role emotional a=.84<br>Acne symptoms a=.74 |                                                |           |                 |

| Acne QoL   | Country (language) in which the questionnaire was evaluated | Reliability |           |                                                                                                                                                      | Measurement Error |           |                 | Criterion Validity |           |                 |
|------------|-------------------------------------------------------------|-------------|-----------|------------------------------------------------------------------------------------------------------------------------------------------------------|-------------------|-----------|-----------------|--------------------|-----------|-----------------|
|            |                                                             | n           | Meth Qual | Result (rating)                                                                                                                                      | n                 | Meth Qual | Result (rating) | n                  | Meth Qual | Result (rating) |
| Muvdi 2020 | Colombia (Spanish)                                          | 176         | a         | ICC (95% CI):<br>Self-perception rc=.72 (.65-.79)<br>Role social rc=.7 (.62-.77)<br>Role emotional rc=.71 (.63-.78)<br>Acne symptoms rc=.67 (.6-.75) |                   |           |                 |                    |           |                 |

| Acne QoL | Country (language) in which the questionnaire was evaluated | Hypothesis Testing | Responsiveness |
|----------|-------------------------------------------------------------|--------------------|----------------|
|          |                                                             |                    |                |

|            |                    | n   | Meth Qual | Result (rating)                                                                                                                                                                                                                                                                                                                                                                                                                                                                                                                                                                                                                                                                                                                                                                                                     | n  | Meth Qual | Result (rating)                                                                                                                                                                                                      |
|------------|--------------------|-----|-----------|---------------------------------------------------------------------------------------------------------------------------------------------------------------------------------------------------------------------------------------------------------------------------------------------------------------------------------------------------------------------------------------------------------------------------------------------------------------------------------------------------------------------------------------------------------------------------------------------------------------------------------------------------------------------------------------------------------------------------------------------------------------------------------------------------------------------|----|-----------|----------------------------------------------------------------------------------------------------------------------------------------------------------------------------------------------------------------------|
| Muvdi 2020 | Colombia (Spanish) | 349 | d         | <p>Known groups comparison only of scores for Self -perception domain and patient reported acne severity (mild, moderate or severe). Actual scores presented and stated as significantly different (<math>p &lt; 0.0001</math>) (no r values reported):</p> <p>Mild acne <math>26.2 \pm 5.9</math><br/> Moderate acne: <math>23.1 \pm 5.6</math><br/> Severe acne: <math>17.4 \pm 6.2</math></p> <p>Convergent validity (Spearman rank R) with Measurement of Body Appearance (MBA) and:<br/> Self Perception 0.45 (0.37-0.54)<br/> Acne Symptoms 0.29 (0.19-0.38)</p> <p>Convergent validity (Spearman rank R) with Satisfaction with Life:<br/> Role emotional -0.25 (-0.35-0.15)</p> <p>Convergent validity (Spearman rank R) with Satisfaction with state of health:<br/> Role emotional -0.21 (-0.31-0.11)</p> | 87 | d         | <p>Mean change (SD):</p> <p>Self perception<br/> Role social<br/> Role emotional<br/> Acne symptoms</p> <p>SRM:<br/> Self perception 0.90<br/> Role social 0.67<br/> Role emotional 0.61<br/> Acne symptoms 0.84</p> |

| Acne QoL (short form) | Country (language) in which the questionnaire was evaluated | Hypothesis Testing                                      |           |                                                                                                                                   | Responsiveness |           |                                                                                                                |
|-----------------------|-------------------------------------------------------------|---------------------------------------------------------|-----------|-----------------------------------------------------------------------------------------------------------------------------------|----------------|-----------|----------------------------------------------------------------------------------------------------------------|
|                       |                                                             | n                                                       | Meth Qual | Result (rating)                                                                                                                   | n              | Meth Qual | Result (rating)                                                                                                |
| Saitta 2012           | USA (English)                                               |                                                         |           |                                                                                                                                   | 2813           | d         | Construct approach: At week 12, change in AcneQ4 with treatment 59% improvement vs 36% with vehicle (no stats) |
| Tan 2006              | Canada (English)                                            | 434 Validation group 1 + 162 in validation group 2= 596 | a         | Convergent validity:Results in line with hypothesis: Correlation AcneQ4 total score with AcneQoL total scores r= 0.967 (p<0.001); |                |           |                                                                                                                |
| Tan 2006              |                                                             | 434 Validation group 1 + 162 in validation group 2= 596 | v         | Convergent validity:Results in line with hypothesis: Correlation AcneQ4 total score with IGA scores r=-0.239                      |                |           |                                                                                                                |
| Tan 2006              |                                                             | 434 validation group 1                                  | i         | Known groups AcneQoL total score and IGA R= -0.262<br>AcneQ4 total score and IGA R=-0.239                                         |                |           |                                                                                                                |

| Acne QoL (short form) | Country (language) in which the questionnaire was evaluated | Reliability |           |                   | Measurement Error |           |                 | Criterion Validity |           |                 |
|-----------------------|-------------------------------------------------------------|-------------|-----------|-------------------|-------------------|-----------|-----------------|--------------------|-----------|-----------------|
|                       |                                                             | n           | Meth Qual | Result (rating)   | n                 | Meth Qual | Result (rating) | n                  | Meth Qual | Result (rating) |
| Tan 2013              | Canada/France (French)                                      | 14          | d         | ICC 0.73, p=0.001 |                   |           |                 |                    |           |                 |

| Acne QoL (short form) | Country (language) in which the questionnaire was evaluated | Hypothesis Testing | Responsiveness |
|-----------------------|-------------------------------------------------------------|--------------------|----------------|
|-----------------------|-------------------------------------------------------------|--------------------|----------------|



|          |  | n | Meth Qual | Result (rating | n  | Meth Qual | Result (rating                                                 |
|----------|--|---|-----------|----------------|----|-----------|----------------------------------------------------------------|
| Tan 2013 |  |   |           |                | 22 | d         | Mean difference 4.14 (95% CI 1.79-649)<br>from Day 0 to Day 60 |

***Assessment of the Psychological and Social Effects of Acne (APSEA)***

| APSEA      | Country (language) in which the questionnaire was evaluated | Hypothesis Testing |           |                                                                       | Responsiveness |           |                                                                                                                                                         |
|------------|-------------------------------------------------------------|--------------------|-----------|-----------------------------------------------------------------------|----------------|-----------|---------------------------------------------------------------------------------------------------------------------------------------------------------|
|            |                                                             | n                  | Meth Qual | Result (rating)                                                       | n              | Meth Qual | Result (rating)                                                                                                                                         |
| Zauli 2014 | Italian (Not reported)                                      | 100                | d         | “linear correlation” between acne severity and APSEA score (p=0.0019) | 100            | d         | After treatment the mean reduction of APSEA score (84.32/44.62 = 1.89) was less marked than the reduction observed in acne severity (0.89/0.28 = 3.12). |

**Cardiff Acne Disability Index (CADI)**

| CADI          | Country (language) in which the questionnaire was evaluated | Structural validity |           |                                                                                            | Internal Consistency |           |                        | Cross-cultural validity/measurement invariance |           |                 |
|---------------|-------------------------------------------------------------|---------------------|-----------|--------------------------------------------------------------------------------------------|----------------------|-----------|------------------------|------------------------------------------------|-----------|-----------------|
|               |                                                             | n                   | Meth Qual | Result (rating)                                                                            | n                    | Meth Qual | Result (rating)        | n                                              | Meth Qual | Result (rating) |
| Perić 2013    | Serbia (Serbian)                                            |                     |           |                                                                                            | 228                  | v         | Cronbach's alpha 0.82  |                                                |           |                 |
| Kim 2017      | Korea (Korean)                                              | 254                 | a         | EFA identified 1 factor                                                                    | 254                  | v         | Cronbach's alpha 0.827 |                                                |           |                 |
| Jankovic 2013 | Serbia (Serbian)                                            | 353                 | a         | Two factors identified in exploratory factor analysis (items 1-3 and items 4-5)            | 353                  | v         | Cronbach's alpha 0.79  |                                                |           |                 |
| Grando 2015   | Brazil (Portuguese)                                         | 100                 | a         | EFA identified 2 factors: "general acne" (items 1, 2, 4, and 5) and "truncal acne"(item 3) | 100                  | d         | Cronbach's alpha 0.73  |                                                |           |                 |

|             |                          |     |   |                                                                      |     |   |                         |  |  |  |
|-------------|--------------------------|-----|---|----------------------------------------------------------------------|-----|---|-------------------------|--|--|--|
| Gupta 2015  | India (Hindi)            | 100 | a | EFA identified 2 factors: “emotional well being” and “social impact” | 100 | d | Cronbach’s alpha 0.722  |  |  |  |
| Law 2009    | China (Chinese)          |     |   |                                                                      | 85  | v | Cronbach’s alpha 0.763  |  |  |  |
| Aghaei 2009 | Saudi Arabia (Persian)   | 100 | a | EFA identified 2 factors: “emotional well being” and “social life”   | 100 | d | Cronbach’s alpha = 0.79 |  |  |  |
| Dreno 2004  | France (French)          |     |   |                                                                      | 22  | v | Cronbach’s alpha = 0.87 |  |  |  |
| Salek 1996  | United Kingdom (English) |     |   |                                                                      | 70  | d | Cronbach’s alpha = 0.90 |  |  |  |

| CADI        | Country (language) in which the questionnaire was evaluated | Reliability |           |                                    | Measurement Error |           |                 | Criterion Validity |           |                 |
|-------------|-------------------------------------------------------------|-------------|-----------|------------------------------------|-------------------|-----------|-----------------|--------------------|-----------|-----------------|
|             |                                                             | n           | Meth Qual | Result (rating)                    | n                 | Meth Qual | Result (rating) | n                  | Meth Qual | Result (rating) |
| Grando 2015 | Brazil (Portuguese)                                         | 20          | d         | ICC = 0.89                         |                   |           |                 |                    |           |                 |
| Law 2009    | China (Chinese)                                             | 33          | d         | ICC=0.784<br>Correlation rho=0.795 |                   |           |                 |                    |           |                 |
| Dreno 2004  | France (French)                                             | 16          | d         | ICC=0.87                           |                   |           |                 |                    |           |                 |

|            |                          |    |   |                                     |  |  |  |  |  |
|------------|--------------------------|----|---|-------------------------------------|--|--|--|--|--|
| Salek 1996 | United Kingdom (English) | 70 | d | Pearson correlation = 0.98; p<0.001 |  |  |  |  |  |
|------------|--------------------------|----|---|-------------------------------------|--|--|--|--|--|

| CADI             | Country (language) in which the questionnaire was evaluated | Hypothesis Testing |           |                                                                                        | Responsiveness |           |                 |
|------------------|-------------------------------------------------------------|--------------------|-----------|----------------------------------------------------------------------------------------|----------------|-----------|-----------------|
|                  |                                                             | n                  | Meth Qual | Result (rating)                                                                        | n              | Meth Qual | Result (rating) |
| Kim 2017         | Korea (Korean)                                              | 254                | v         | Path analysis KAGS->CADI: Standardized estimate = 0.526, p<0.001                       |                |           |                 |
| Zaraa 2013       | Tunisia (French)                                            | 82                 | i         | “Positive correlation” between CADI and ECLA score, but no specific results presented. |                |           |                 |
| Jankovic 2013    | Serbia (Serbian)                                            | 353                | a         | Spearman’s rho with CDLQI = 0.66; p<0.001                                              |                |           |                 |
| Grando 2015      | Brazil (Portuguese)                                         | 100                | a         | Spearman’s rho with CDLQI/DLQI= 0.802 p<0.001                                          |                |           |                 |
| Grando 2015      | Brazil (Portuguese)                                         | 100                | a         | Spearman’s rho with GAGS = 0.234 p=0.019                                               |                |           |                 |
| Gupta 2015       | India (Hindi)                                               | 100                | a         | Spearman’s rho with DLQI = 0.880; p=0.01                                               |                |           |                 |
| Law 2009         | China (Chinese)                                             | 85                 | a         | Spearman’s rho with DLQI= 0.58; p=0.004                                                |                |           |                 |
| Law 2009         | China (Chinese)                                             | 85                 | a         | Spearman’s rho with Cantonese DLQI= 0.72; p<0.001                                      |                |           |                 |
| Law 2009         | China (Chinese)                                             | 85                 | a         | Spearman’s rho with GAGS = 0.352; p=0.001                                              |                |           |                 |
| Walker 2005      | Scotland (English)                                          | 147                | a         | Compared with CDLQI Spearman’s rho = 0.65                                              |                |           |                 |
| Alsulaimani 2020 | Saudi Arabia (Arabic)                                       | 45                 | v         | Pearson correlation coefficient with GAGS = 0.327; p=0.016                             |                |           |                 |

|                  |                          |     |   |                                                                                             |    |   |                                                                                                                                                                                                                                                                                   |
|------------------|--------------------------|-----|---|---------------------------------------------------------------------------------------------|----|---|-----------------------------------------------------------------------------------------------------------------------------------------------------------------------------------------------------------------------------------------------------------------------------------|
| Alsulaimani 2020 | Saudi Arabia (Arabic)    | 45  | v | Pearson correlation coefficient with IGA = 0.233; p=0.091                                   |    |   |                                                                                                                                                                                                                                                                                   |
| Alsulaimani 2020 | Saudi Arabia (Arabic)    | 45  | a | Pearson correlation coefficient with DLQI = 0.649; p<0.0001                                 |    |   |                                                                                                                                                                                                                                                                                   |
| Aghaei 2009      | Saudi Arabia (Persian)   | 100 | a | Known group validity: moderate- to-severe acne versus mild type (8.2 versus 4.3) (p<0.001). |    |   |                                                                                                                                                                                                                                                                                   |
| Salek 1996       | United Kingdom (English) | 70  | v | Pearson correlation with ADI = 0.48, p<0.01                                                 |    |   |                                                                                                                                                                                                                                                                                   |
| Salek 1996       | United Kingdom (English) | 100 | v | Spearman correlation with acne clinical severity= 0.23; p<0.05                              |    |   |                                                                                                                                                                                                                                                                                   |
| Oakley 1996      | New Zealand (English)    | 104 | i | “The ADI correlated poorly with the clinical severity of the acne.”                         |    |   |                                                                                                                                                                                                                                                                                   |
| Oakley 1996      | New Zealand (English)    |     |   |                                                                                             | 62 | i | Thirty-two patients had received isotretinoin. Their median pre-treatment ADI was 7 (range 3-14). After treatment it was 2 (range 0-6, Thirty patients treated by other means had a median pre-treatment ADI of 5 (range 2-11) and a median post-treatment ADI of 3 (range 0-10). |
| Motley 1992      | United Kingdom (English) | 66  | i | Only p-values given, correlations on measured on each question not total score              | 50 | i | Median IGA score decreased from 1.5 to 0.1 for the face (no statistical comparisons provided)                                                                                                                                                                                     |

Échelle de Cotation des Lésions d’Acné (ECLA) scale3  
Global Acne Grading System (GAGs)  
Korean acne grading system (KAGS)

## CompAQ

| CompAQ                     | Country (language) in which the questionnaire was evaluated | Structural validity |           |                                                                                                                                                                                                                                                                                                                                                                                                                                   | Internal Consistency |           |                                                                                                                                                                                      | Cross-cultural validity/measurement invariance |           |                 |
|----------------------------|-------------------------------------------------------------|---------------------|-----------|-----------------------------------------------------------------------------------------------------------------------------------------------------------------------------------------------------------------------------------------------------------------------------------------------------------------------------------------------------------------------------------------------------------------------------------|----------------------|-----------|--------------------------------------------------------------------------------------------------------------------------------------------------------------------------------------|------------------------------------------------|-----------|-----------------|
|                            |                                                             | n                   | Meth Qual | Result (rating)                                                                                                                                                                                                                                                                                                                                                                                                                   | n                    | Meth Qual | Result (rating)                                                                                                                                                                      | n                                              | Meth Qual | Result (rating) |
| McLellan 2018              | Canada, United States, United Kingdom (English)             | 234                 | V         | 4-domain confirmatory did not fit well. Exploratory factor analysis suggested that the fit was better with a 5 domain model. Two confirmatory factor analyses suggested moderate fit for the 5-domain structure: facial acne ( $\chi^2 = 367.687$ , $P < .001$ ; CFI = 0.929; TLI = 0.915; RMSEA = 0.08; SRMR = 0.056) and torso acne ( $\chi^2 = 294.015$ , $P < .001$ ; CFI = 0.931; TLI = 0.917; RMSEA = 0.098; SRMR = 0.054). | 234                  | v         | Cronbach's alphas: Psychological/emotional = 0.951<br>Social judgement from others = 0.908<br>Social interactions = 0.944<br>Treatment concerns = 0.864<br>Physical symptoms = 0.839 |                                                |           |                 |
| McLellan 2018 (short form) | Canada, United States, United Kingdom (English)             | 234                 | V         | CFA conducted on the short form suggests good fit for both face ( $\chi^2 = 3.60$ , $P < .001$ ; CFI = 0.999; df = 3<br>TLI = 0.997; RMSEA = 0.025; SRMR = 0.013) and torso                                                                                                                                                                                                                                                       | 234                  | v         | Cronbach alpha= 0.84                                                                                                                                                                 |                                                |           |                 |

|  |  |  |  |                                                                                                               |  |  |  |  |  |
|--|--|--|--|---------------------------------------------------------------------------------------------------------------|--|--|--|--|--|
|  |  |  |  | acne ( $\chi^2 = 5.65, P < .001$ ;<br>CFI = 0.987; TLI = 0.958;<br>df = 3<br>RMSEA = 0.098; SRMR =<br>0.027). |  |  |  |  |  |
|--|--|--|--|---------------------------------------------------------------------------------------------------------------|--|--|--|--|--|

| CompAQ        | Country (language) in which the questionnaire was evaluated | Hypothesis Testing |           |                                                                                                                                                                                                                                                                                                                                                             | Responsiveness |           |                 |
|---------------|-------------------------------------------------------------|--------------------|-----------|-------------------------------------------------------------------------------------------------------------------------------------------------------------------------------------------------------------------------------------------------------------------------------------------------------------------------------------------------------------|----------------|-----------|-----------------|
|               |                                                             | n                  | Meth Qual | Result (rating)                                                                                                                                                                                                                                                                                                                                             | n              | Meth Qual | Result (rating) |
| McLellan 2018 | Canada, United States, United Kingdom (English)             | 234                | a         | DLQI:<br>Psychological emotional: -0.44<br>Judgment from others: -0.43<br>Social interaction: -0.49<br>Treatment concerns: -0.40<br>Physical symptoms: -0.46<br><br>QLES:<br>Psychological emotional: -0.36<br>Judgment from others: -0.42<br>Social interaction: -0.40<br>Treatment concerns: -0.24<br>Physical symptoms: -0.35<br><br>DASS-21 depression: |                |           |                 |



|                            |                                                 |     |   |                                                                                                                                                                                                        |  |  |  |
|----------------------------|-------------------------------------------------|-----|---|--------------------------------------------------------------------------------------------------------------------------------------------------------------------------------------------------------|--|--|--|
|                            |                                                 |     |   | Psychological emotional: 0.43<br>Judgment from others: 0.50<br>Social interaction: 0.56<br>Treatment concerns: 0.38<br>Physical symptoms: 0.39<br><br>Also correlated with DASS-21 anxiety, and stress |  |  |  |
| McLellan 2018 (short form) | Canada, United States, United Kingdom (English) | 234 | a | The short form was correlated with DLQI (-0.55), DASS-21, Depression, (0.51) anxiety(0.48), stress(0.55), and QLES (=0.44)                                                                             |  |  |  |

## **DERMATOLOGY SPECIFIC**

### **CDLQI**

| CDLQI         | Country (language) in which the questionnaire was evaluated | Structural validity |           |                         | Internal Consistency |           |                                                                                                                                                                                                                                              | Cross-cultural validity/measurement invariance |           |                 |
|---------------|-------------------------------------------------------------|---------------------|-----------|-------------------------|----------------------|-----------|----------------------------------------------------------------------------------------------------------------------------------------------------------------------------------------------------------------------------------------------|------------------------------------------------|-----------|-----------------|
|               |                                                             | n                   | Meth Qual | Result (rating)         | n                    | Meth Qual | Result (rating)                                                                                                                                                                                                                              | n                                              | Meth Qual | Result (rating) |
| Janković 2013 | Slovenia (Serbian)                                          | 353                 | a         | EFA identified 1 factor | 353                  | v         | Cronbach's alpha = 0.870 overall and for individual items: Symptoms (items 1 + 2) = 0.554, personal relationship (items 3 + 8) = 0.632, Leisure (items 4,5,6) = 0.630, School/holiday (item 7), sleeping (item 9), Treatment (item 10) = n/a |                                                |           |                 |
| Reljić 2014   | Serbia (Serbian)                                            |                     |           |                         | 199                  | d         | Cronbach's alpha overall = 0.83                                                                                                                                                                                                              |                                                |           |                 |

| CDLQI        | Country (language) in which the questionnaire was evaluated | Hypothesis Testing |           |                                                                                                                                                                                                                                                                                                                                                                                                                                                                                                                                        |  |  | Responsiveness |           |                 |
|--------------|-------------------------------------------------------------|--------------------|-----------|----------------------------------------------------------------------------------------------------------------------------------------------------------------------------------------------------------------------------------------------------------------------------------------------------------------------------------------------------------------------------------------------------------------------------------------------------------------------------------------------------------------------------------------|--|--|----------------|-----------|-----------------|
|              |                                                             | n                  | Meth Qual | Result (rating)                                                                                                                                                                                                                                                                                                                                                                                                                                                                                                                        |  |  | n              | Meth Qual | Result (rating) |
| Tasoula 2012 | Greece (not reported)                                       | 491                | d         | Mean CDLQI compared between acne severity determined by lesion count was significant ( $p < 0.0001$ ) with mean scores mild (2.94) moderate (5.40), and severe (12.05)                                                                                                                                                                                                                                                                                                                                                                 |  |  |                |           |                 |
| Tasoula 2012 | Greece (not reported)                                       | 491                | i         | $P < 0.0001$ for all comparisons. The 3 medians are given for each score i.e. Score (mild, moderate, severe)<br>Embarrassment and decreased self esteem (0.54, 0.94, 1.97)<br>Symptoms (0.53, 0.98, 1.46)<br>Teasing-feelings of unworthiness (0.32, 0.67, 1.46) Dressing (0.22, 0.49, 1.29), Discomfort of treatment (0.25, 0.43, 1.00), friendship-Relationship building (0.16, 0.44, 0.96), School work- Holiday time (0.23, 0.41, 1.11), Hobbies (0.19, 0.41, 1.00), sports (0.13, 0.29, 0.93), sleep disorders (0.12, 0.40, 0.86) |  |  |                |           |                 |

|                  |                    |     |   |                                          |  |  |  |
|------------------|--------------------|-----|---|------------------------------------------|--|--|--|
| Janković<br>2013 | Slovenia (Serbian) | 353 | d | Spearman rho with CADI = 0.66, p<0.0001  |  |  |  |
| Walker<br>2005   | Scotland (English) | 147 | a | Compared with CADI Spearman's rho = 0.65 |  |  |  |

## DLQI

| DQLI           | Country (language) in which the questionnaire was evaluated | Structural validity |           |                                                         | Internal Consistency |           |                         | Cross-cultural validity/measurement invariance |           |                 |
|----------------|-------------------------------------------------------------|---------------------|-----------|---------------------------------------------------------|----------------------|-----------|-------------------------|------------------------------------------------|-----------|-----------------|
|                |                                                             | n                   | Meth Qual | Result (rating)                                         | n                    | Meth Qual | Result (rating)         | n                                              | Meth Qual | Result (rating) |
| Takahashi 2006 | Japan (Japanese)                                            | 197                 | a         | Exploratory factor analysis confirmed unidimensionality | 197                  | v         | Cronbach's alpha = 0.83 |                                                |           |                 |

| DQLI           | Country (language) in which the questionnaire was evaluated | Reliability |           |                 | Measurement Error |           |                 | Criterion Validity |           |                 |
|----------------|-------------------------------------------------------------|-------------|-----------|-----------------|-------------------|-----------|-----------------|--------------------|-----------|-----------------|
|                |                                                             | n           | Meth Qual | Result (rating) | n                 | Meth Qual | Result (rating) | n                  | Meth Qual | Result (rating) |
| Takahashi 2006 | Japan (Japanese)                                            | 44          | d         | ICC = 0.90      |                   |           |                 |                    |           |                 |

| DQLI             | Country (language) in which the questionnaire was evaluated | Hypothesis Testing |           |                                                   | Responsiveness |           |                                                                                |
|------------------|-------------------------------------------------------------|--------------------|-----------|---------------------------------------------------|----------------|-----------|--------------------------------------------------------------------------------|
|                  |                                                             | n                  | Meth Qual | Result (rating)                                   | n              | Meth Qual | Result (rating)                                                                |
| Alsulaimani 2020 | Saudi Arabia (Arabic)                                       | 54                 | v         | Pearson correlation coefficient = 0.197; p=0.153  |                |           |                                                                                |
| Alsulaimani 2020 | Saudi Arabia (Arabic)                                       | 54                 | v         | Pearson correlation coefficient = 0.132; p=0.341  |                |           |                                                                                |
| Alsulaimani 2020 | Saudi Arabia (Arabic)                                       | 54                 | V (?)     | Pearson correlation coefficient = 0.649; p<0.0001 |                |           |                                                                                |
| Klassen 2000     | United Kingdom (English)                                    |                    |           |                                                   | 58             | i         | 4 months:<br>Mean difference from baseline = -5.7<br>effect size = 0.98; p=0.0 |

|                |                          |     |   |                                                                                                                                                                     |                                 |   |                                                                                                                                   |
|----------------|--------------------------|-----|---|---------------------------------------------------------------------------------------------------------------------------------------------------------------------|---------------------------------|---|-----------------------------------------------------------------------------------------------------------------------------------|
|                |                          |     |   |                                                                                                                                                                     |                                 |   | 12 months:<br>Mean difference from baseline = -6.1<br>Effect size = 1.2; p<0.01                                                   |
| Richter 2016   | Germany (German)         |     |   |                                                                                                                                                                     | 41                              | d | Effect size for overall group was 0.64. For 2-3 grade ISGA improvement=0.66, for 1 grade improvement = 0.62, for unchanged = 0.23 |
| Newton 1997    | United Kingdom (English) |     |   |                                                                                                                                                                     | 4 months = 58<br>12 months = 51 | i | Effects size for 4 months = 0.98 (0.70-1.27)<br>Effect size for 1 year = 1.12 (0.81-1.43)                                         |
| Takahashi 2006 | Japan (Japanese)         | 197 | a | Pearson correlations between DLQI and<br>Role-physical = -0.33<br>Vitality = -0.42<br>Mental health = -0.48<br>Social functioning = -0.49<br>Role-emotional = -0.49 |                                 |   |                                                                                                                                   |
| Takahashi 2006 | Japan (Japanese)         | 197 | a | Known groups validity with IGA (p<0.01) and perceived acne symptom severity (p<0.001)                                                                               |                                 |   |                                                                                                                                   |

Investigators Static Global Assessment (ISGA)

**DSQL**

| DSQL          | Country (language) in which the questionnaire was evaluated | Structural validity |           |                                                                                                                                                                                                                                                                                              | Internal Consistency |           |                                                                                                                                                                                   | Cross-cultural validity/measurement invariance |           |                 |
|---------------|-------------------------------------------------------------|---------------------|-----------|----------------------------------------------------------------------------------------------------------------------------------------------------------------------------------------------------------------------------------------------------------------------------------------------|----------------------|-----------|-----------------------------------------------------------------------------------------------------------------------------------------------------------------------------------|------------------------------------------------|-----------|-----------------|
|               |                                                             | n                   | Meth Qual | Result (rating)                                                                                                                                                                                                                                                                              | n                    | Meth Qual | Result (rating)                                                                                                                                                                   | n                                              | Meth Qual | Result (rating) |
| Anderson 1998 | United States (English)                                     |                     |           |                                                                                                                                                                                                                                                                                              | 282                  | v         | Cronbach's alpha for Symptoms = 0.82<br>ADLs = 0.85<br>Social activities = 0.96<br>Work/School = 0.92<br>Self-perceptions = 0.93<br>Total score = 0.90                            |                                                |           |                 |
| Anderson 1997 | United States (English)                                     | 392                 | a         | 6 factors identified that account for 86% of variance<br><br>8/9 of symptom items = 33% of variance explained<br>5/6 work/school items; 3/5 ADL items; one symptom item = 60%<br>9/9 social items = 64%<br>5/5 self perception = 55%<br>9/9 SF-36 mental well-being and vitality items = 34% | 392                  | v         | Cronbach's alpha for Symptoms = 0.78<br>ADLs = 0.78<br>Social functioning = 0.95<br>Work/School = 0.90<br>Self-perceptions = 0.92<br>SF-36 Mental = 0.75<br>SF-36 Vitality = 0.74 |                                                |           |                 |

| DSQL          | Country (language) in which the questionnaire was evaluated | Reliability |           |                                                                                                                                                                               | Measurement Error |           |                 | Criterion Validity |           |                 |
|---------------|-------------------------------------------------------------|-------------|-----------|-------------------------------------------------------------------------------------------------------------------------------------------------------------------------------|-------------------|-----------|-----------------|--------------------|-----------|-----------------|
|               |                                                             | n           | Meth Qual | Result (rating)                                                                                                                                                               | n                 | Meth Qual | Result (rating) | n                  | Meth Qual | Result (rating) |
| Anderson 1998 | United States (English)                                     | 282         | a         | ICC for Symptoms = 0.84<br>ADLs = 0.72<br>Social activities = 0.83<br>Work/School = 0.77<br>Self-perceptions = 0.87<br>DSQL total = 0.92                                      |                   |           |                 |                    |           |                 |
| Anderson 1997 | United States (English)                                     | 392         | d         | Correlations for Symptoms = 0.82<br>ADLs = 0.82<br>Social functioning = 0.88<br>Work/School = 0.83<br>Self-perceptions = 0.89<br>SF-36 Mental = 0.81<br>SF-36 Vitality = 0.81 |                   |           |                 |                    |           |                 |

| DSQL | Country (language) in which the questionnaire was evaluated | Hypothesis Testing | Responsiveness |
|------|-------------------------------------------------------------|--------------------|----------------|
|------|-------------------------------------------------------------|--------------------|----------------|

|               |                         | n   | Meth Qual | Result (rating)                                                                                                                                                                                                                 | n   | Meth Qual | Result (rating)                                                                                                                                   |
|---------------|-------------------------|-----|-----------|---------------------------------------------------------------------------------------------------------------------------------------------------------------------------------------------------------------------------------|-----|-----------|---------------------------------------------------------------------------------------------------------------------------------------------------|
| Anderson 1998 | United States (English) | 282 | v         | Pearson correlation of DSQL total score with patient-rated severity= 0.59                                                                                                                                                       | 282 | a         | Pearson correlation of DSQL total score with physician-rated change in severity = -0.34, patient-rated severity = 0.61, total lesion count = 0.37 |
| Anderson 1998 | United States (English) | 282 | v         | Divergent validity<br>Pearson correlation of DSQL total score with Marlowe-Crowne social desirability = 0.09                                                                                                                    |     |           |                                                                                                                                                   |
| Anderson 1997 | United States (English) | 392 | a         | Pearson correlation DSQL vs distress rating<br>Physical symptoms = 0.63<br>Daily activities = 0.52<br>Social functioning = 0.51<br>Work/school = 0.53<br>Self-perception = 0.42<br>SF-36 Mental = 0.35<br>SF-36 Vitality = 0.27 |     |           |                                                                                                                                                   |
| DSQL          | United States (English) | 392 | v         | Pearson correlation DSQL vs Severity rating<br>Physical symptoms = 0.43<br>Daily activities = 0.44<br>Social functioning = 0.41<br>Work/school = 0.21<br>Self-perception = 0.54<br>SF-36 Mental = 0.21<br>SF-36 Vitality = 0.19 |     |           |                                                                                                                                                   |
| Anderson 1997 | United States (English) | 392 | a         | Pearson correlation DSQL vs SDS<br>Physical symptoms = 0.08<br>Daily activities = -0.08<br>Social functioning = 0.06<br>Work/school = 0.05<br>Self-perception = 0.09<br>SF-36 Mental = 0.29<br>SF-36 Vitality = 0.16            |     |           |                                                                                                                                                   |



|                  |                            |     |   |                                                                                                                                                                                                                                                                                         |  |  |  |
|------------------|----------------------------|-----|---|-----------------------------------------------------------------------------------------------------------------------------------------------------------------------------------------------------------------------------------------------------------------------------------------|--|--|--|
| Anderson<br>1997 | United States<br>(English) | 392 | v | <p>Comparisons of acne scarring with DSQL level</p> <p>Significant differences seen for Daily activities (p=0.031), Social functioning (p=0.016), Work/school (p=0.045), Self-perception (p=0.003), SF-36 Vitality (p=0.028)</p> <p>DSQL was higher for scarring for all categories</p> |  |  |  |
|------------------|----------------------------|-----|---|-----------------------------------------------------------------------------------------------------------------------------------------------------------------------------------------------------------------------------------------------------------------------------------------|--|--|--|

**OSSAS**

| PROM          | Country (language) in which the questionnaire was evaluated | Structural validity |           |                                                                                                                                               | Internal Consistency |           |                                                                          | Cross-cultural validity/measurement invariance |           |                 |
|---------------|-------------------------------------------------------------|---------------------|-----------|-----------------------------------------------------------------------------------------------------------------------------------------------|----------------------|-----------|--------------------------------------------------------------------------|------------------------------------------------|-----------|-----------------|
|               |                                                             | n                   | Meth Qual | Result (rating)                                                                                                                               | n                    | Meth Qual | Result (rating)                                                          | n                                              | Meth Qual | Result (rating) |
| Arbuckle 2009 | United States (English)                                     | 196                 | a         | Factor loading Sensation (4 items) = 0.61-0.80<br>Visual (3 items) = 0.64-0.72<br>Tactile (3 items) = 0.42-0.74<br>Blotting = (1 item) = 0.54 | 196                  | v         | Cronbach's alpha for sensation = 0.86<br>Visual = 0.83<br>Tactile = 0.89 |                                                |           |                 |

| PROM          | Country (language) in which the questionnaire was evaluated | Reliability |           |                                                                                                   | Measurement Error |           |                 | Criterion Validity |           |                 |
|---------------|-------------------------------------------------------------|-------------|-----------|---------------------------------------------------------------------------------------------------|-------------------|-----------|-----------------|--------------------|-----------|-----------------|
|               |                                                             | n           | Meth Qual | Result (rating)                                                                                   | n                 | Meth Qual | Result (rating) | n                  | Meth Qual | Result (rating) |
| Arbuckle 2009 | United States (English)                                     | 152         | v         | No change on PGI-C, ICC<br>Sensation = 0.71<br>Visual = 0.64<br>Tactile = 0.63<br>Blotting = 0.62 |                   |           |                 |                    |           |                 |
| Arbuckle 2009 | United States (English)                                     | 152         | v         | No change on CGI-C, ICC<br>Sensation = 0.72                                                       |                   |           |                 |                    |           |                 |

|  |  |  |  |                                                       |  |  |  |  |  |  |
|--|--|--|--|-------------------------------------------------------|--|--|--|--|--|--|
|  |  |  |  | Visual = 0.61<br>Tactile = 0.63<br>Blotting =<br>0.58 |  |  |  |  |  |  |
|--|--|--|--|-------------------------------------------------------|--|--|--|--|--|--|

| PROM          | Country (language) in which the questionnaire was evaluated | Hypothesis Testing |           |                                                                                                                                                                                                                                                              | Responsiveness |           |                 |
|---------------|-------------------------------------------------------------|--------------------|-----------|--------------------------------------------------------------------------------------------------------------------------------------------------------------------------------------------------------------------------------------------------------------|----------------|-----------|-----------------|
|               |                                                             | n                  | Meth Qual | Result (rating)                                                                                                                                                                                                                                              | n              | Meth Qual | Result (rating) |
| Arbuckle 2009 | United States (English)                                     | 196                | a         | Correlations between OSSAS and Skindex-29 ranged from 0.20 to 0.38                                                                                                                                                                                           |                |           |                 |
| Arbuckle 2009 | United States (English)                                     | 196                | a         | Correlations between OSSAS and Acne-QoL ranged from -0.10 to -0.35                                                                                                                                                                                           |                |           |                 |
| Arbuckle 2009 | United States (English)                                     | 196                | a         | All OSSAS domain score means stratified by PGI-S severity levels were significantly different (P<0.0001 for all)                                                                                                                                             |                |           |                 |
| Arbuckle 2009 | United States (English)                                     | 196                | a         | All OSSAS domain score means stratified by subject self-assessment of skin oiliness (mild, moderate, severe) were significantly different (P<0.0001 for all)                                                                                                 |                |           |                 |
| Arbuckle 2009 | United States (English)                                     | 196                | a         | All OSSAS domain score means stratified by subject self-assessment of bother were significantly different (P<0.0001 for all)                                                                                                                                 |                |           |                 |
| Arbuckle 2009 | United States (English)                                     | 196                | a         | For mean OSSAS domain scores stratified by CGI-S nose area severity levels (mildly, moderately, severely) only those for the visual and tactile domain scores were significant (p=0.0086 and p=0.0046 respectively)                                          |                |           |                 |
| Arbuckle 2009 | United States (English)                                     | 196                | a         | For mean OSSAS domain scores stratified by CGI-S forehead area severity levels (mildly, moderately, severely) visual, tactile, and blotting domains had significant differences in means between severity levels (p=0.0333, 0.0035, and 0.0128 respectively) |                |           |                 |
| Arbuckle 2009 | United States (English)                                     | 196                | a         | OSSAS domain sub-scores correlated with sebumeter assessment as follows: Sensation = 0.01<br>Visual = 0.22<br>Tactile = 0.32<br>Blotting = 0.34                                                                                                              |                |           |                 |

Patient Global Impression of Change (PGI-C) item.  
Clinical Global Impression of Change (CGI-C) item.

**OSIS**

| PROM          | Country (language) in which the questionnaire was evaluated | Structural validity |           |                                                                                                                                                                                                                                                                                                                                                                                                                                                      | Internal Consistency |           |                                                            | Cross-cultural validity/measurement invariance |           |                 |
|---------------|-------------------------------------------------------------|---------------------|-----------|------------------------------------------------------------------------------------------------------------------------------------------------------------------------------------------------------------------------------------------------------------------------------------------------------------------------------------------------------------------------------------------------------------------------------------------------------|----------------------|-----------|------------------------------------------------------------|------------------------------------------------|-----------|-----------------|
|               |                                                             | n                   | Meth Qual | Result (rating)                                                                                                                                                                                                                                                                                                                                                                                                                                      | n                    | Meth Qual | Result (rating)                                            | n                                              | Meth Qual | Result (rating) |
| Arbuckle 2009 | United States (English)                                     | 196                 | v         | All items performed well, loading at a level of >0.30 with one factor. Three items asking about the annoyance/irritability of oily skin loaded most highly on the first factor (factor coefficients of 0.77, 0.73 and 0.57, respectively) and were included on the Annoyance scale. The three remaining items loaded most highly on the second factor (coefficients of 0.84, 0.75 and 0.52, respectively) and were included in the Self-Image scale. | 196                  | v         | Cronbach's alpha for Self image = 0.87<br>Annoyance = 0.82 |                                                |           |                 |

| PROM          | Country (language) in which the questionnaire was evaluated | Reliability |           |                                                                  | Measurement Error |           |                 | Criterion Validity |           |                 |
|---------------|-------------------------------------------------------------|-------------|-----------|------------------------------------------------------------------|-------------------|-----------|-----------------|--------------------|-----------|-----------------|
|               |                                                             | n           | Meth Qual | Result (rating)                                                  | n                 | Meth Qual | Result (rating) | n                  | Meth Qual | Result (rating) |
| Arbuckle 2009 | United States (English)                                     | 152         | v         | No change on PGI-C, ICC<br>Self-image = 0.69<br>Annoyance = 0.74 |                   |           |                 |                    |           |                 |
| Arbuckle 2009 | United States (English)                                     | 152         | v         | No change on CGI-C, ICC<br>Self-image = 0.66<br>Annoyance = 0.70 |                   |           |                 |                    |           |                 |

| PROM          | Country (language) in which the questionnaire was evaluated | Hypothesis Testing |           |                                                                                                                                                                                                        | Responsiveness |           |                 |
|---------------|-------------------------------------------------------------|--------------------|-----------|--------------------------------------------------------------------------------------------------------------------------------------------------------------------------------------------------------|----------------|-----------|-----------------|
|               |                                                             | n                  | Meth Qual | Result (rating)                                                                                                                                                                                        | n              | Meth Qual | Result (rating) |
| Arbuckle 2009 | United States (English)                                     | 196                | a         | Correlations between OSSAS and Skindex-29 ranged from 0.37 to 0.73                                                                                                                                     |                |           |                 |
| Arbuckle 2009 | United States (English)                                     | 196                | a         | Correlations between OSSAS and Acne-QoL ranged from -0.48 to -0.73                                                                                                                                     |                |           |                 |
| Arbuckle 2009 | United States (English)                                     | 196                | a         | OSIS subdomains self-image and annoyance had significantly different means between subject self-assessment of bother scores (Somewhat bothered, very bothered, extremely bothered). (P<0.0001 for all) |                |           |                 |
| Arbuckle 2009 | United States (English)                                     | 196                | a         | OSIS subdomains self-image and annoyance had significantly different means between PGI-S scores. (P<0.0001 for all)                                                                                    |                |           |                 |
| Arbuckle 2009 | United States (English)                                     | 196                | a         | OSIS subdomains self-image and annoyance had significantly different means between levels (mild, moderate, severe) of subject self-assessment of skin oiliness. (P<0.0001 for all)                     |                |           |                 |

Patient Global Impression of Change (PGI-C) item.  
Clinical Global Impression of Change (CGI-C) item.

**Skindex-29**

| Skindex-29           | Country (language) in which the questionnaire was evaluated | Hypothesis Testing               |           |                                                                                                                                                                                                                                | Responsiveness |           |                                                                                                                                                                                                                                                                                                  |
|----------------------|-------------------------------------------------------------|----------------------------------|-----------|--------------------------------------------------------------------------------------------------------------------------------------------------------------------------------------------------------------------------------|----------------|-----------|--------------------------------------------------------------------------------------------------------------------------------------------------------------------------------------------------------------------------------------------------------------------------------------------------|
|                      |                                                             | n                                | Meth Qual | Result (rating)                                                                                                                                                                                                                | n              | Meth Qual | Result (rating)                                                                                                                                                                                                                                                                                  |
| Jones-Caballero 2007 | Spain (Spanish)                                             | 1892 (baseline) and 1613 (final) | a         | Baseline correlation between symptoms (r=0.09), Emotions (0.11), and functioning (0.11) and objective severity<br>Final correlations between objective severity and symptoms (r=0.30), Emotions (0.29), and Functioning (0.26) | 1613           | d         | Effect sizes for skindex scores by objective severity change:<br>Symptoms scale: improved (0.59), did not change (0.13), worsened (-0.26)<br>Emotions: Improved (0.55), did not change (0.03), and worsened (-0.07)<br>Functioning: Improved (0.39), did not change (0.02), and worsened (-0.14) |
| Jones-Caballero 2007 | Spain (Spanish)                                             | 1892 (baseline) and 1613 (final) | d         | Known groups validity: Skindex symptoms, emotions, and functioning scores increased with increasing objective severity at baseline (p<0.001 for each) and final (p<0.001)                                                      | 1630           | d         | Effect sizes for skindex scores by subjective severity change:<br>Symptoms scale: improved (0.63), did not change (0.17), worsened (-0.21)<br>Emotions: Improved (0.58), did not change (0.16), and worsened (0.02)<br>Functioning:                                                              |

|  |  |  |  |  |  |  |                                                              |
|--|--|--|--|--|--|--|--------------------------------------------------------------|
|  |  |  |  |  |  |  | Improved (0.41), did not change (0.10), and worsened (-0.13) |
|--|--|--|--|--|--|--|--------------------------------------------------------------|



**GENERIC**

***UK Sickness Impact Profile (UKSIP)***

| UKSIP      | Country (language) in which the questionnaire was evaluated | Structural validity |           |                 | Internal Consistency |           |                         | Cross-cultural validity/measurement invariance |           |                 |
|------------|-------------------------------------------------------------|---------------------|-----------|-----------------|----------------------|-----------|-------------------------|------------------------------------------------|-----------|-----------------|
|            |                                                             | n                   | Meth Qual | Result (rating) | n                    | Meth Qual | Result (rating)         | n                                              | Meth Qual | Result (rating) |
| Salek 1996 | United Kingdom (English)                                    |                     |           |                 | 70                   | d         | Cronbach's alpha = 0.80 |                                                |           |                 |

| UKSIP      | Country (language) in which the questionnaire was evaluated | Reliability |           |                                                           | Measurement Error |           |                 | Criterion Validity |           |                 |
|------------|-------------------------------------------------------------|-------------|-----------|-----------------------------------------------------------|-------------------|-----------|-----------------|--------------------|-----------|-----------------|
|            |                                                             | n           | Meth Qual | Result (rating)                                           | n                 | Meth Qual | Result (rating) | n                  | Meth Qual | Result (rating) |
| Salek 1996 | United Kingdom (English)                                    | 70          | d         | Pearson correlation = 0.99, >0.83 for each category score |                   |           |                 |                    |           |                 |

| UKSIP      | Country (language) in which the questionnaire was evaluated | Hypothesis Testing |           |                                                                 | Responsiveness |           |                 |
|------------|-------------------------------------------------------------|--------------------|-----------|-----------------------------------------------------------------|----------------|-----------|-----------------|
|            |                                                             | n                  | Meth Qual | Result (rating)                                                 | n              | Meth Qual | Result (rating) |
| Salek 1996 | United Kingdom (English)                                    | 100                | V         | Spearman correlation with acne clinical severity = 0.10; p>0.05 |                |           |                 |

***EQ-5D***

| EQ-5D        | Country (language) in which the questionnaire was evaluated | Hypothesis Testing |           |                 | Responsiveness |           |                                                                                                                                                                    |
|--------------|-------------------------------------------------------------|--------------------|-----------|-----------------|----------------|-----------|--------------------------------------------------------------------------------------------------------------------------------------------------------------------|
|              |                                                             | n                  | Meth Qual | Result (rating) | n              | Meth Qual | Result (rating)                                                                                                                                                    |
| Klassen 2000 | United Kingdom (English)                                    |                    |           |                 | 56             | i         | 4 months:<br>Mean difference from baseline = 0.07 effect size = -0.44; p=0.03<br>12 months:<br>Mean difference from baseline = 0.09<br>Effect size = -0.53; p<0.01 |

**SF-36**

| SF-36        | Country (language) in which the questionnaire was evaluated | Hypothesis Testing |           |                 | Responsiveness |           |                                                                                                                                                                                                                                                                                                                                                          |
|--------------|-------------------------------------------------------------|--------------------|-----------|-----------------|----------------|-----------|----------------------------------------------------------------------------------------------------------------------------------------------------------------------------------------------------------------------------------------------------------------------------------------------------------------------------------------------------------|
|              |                                                             | n                  | Meth Qual | Result (rating) | n              | Meth Qual | Result (rating)                                                                                                                                                                                                                                                                                                                                          |
| Klassen 2000 | United Kingdom (English)                                    |                    |           |                 | 52             | i         | PCS:<br>4 months:<br>Mean difference from baseline = 2.3 effect size = -0.35; p=0.04<br>12 months:<br>Mean difference from baseline = 2.3<br>Effect size = -0.34; p<0.01<br><br>MCS:<br>4 months:<br>Mean difference from baseline = 2.9 effect size = -0.30; p=0.06<br>12 months:<br>Mean difference from baseline = 4.6<br>Effect size = -0.45; p<0.01 |

### ***Patient Benefit Index (PBI)***

| <b>PBI</b>                      | Country (language) in which the questionnaire was evaluated | Structural validity |           |                 | Internal Consistency |           |                         | Cross-cultural validity/measurement invariance |           |                 |
|---------------------------------|-------------------------------------------------------------|---------------------|-----------|-----------------|----------------------|-----------|-------------------------|------------------------------------------------|-----------|-----------------|
|                                 |                                                             | n                   | Meth Qual | Result (rating) | n                    | Meth Qual | Result (rating)         | n                                              | Meth Qual | Result (rating) |
| Augustin 2009 (cross sectional) | Germany (German)                                            |                     |           |                 | 500 (50 acne)        | i         | Cronbach's alpha = 0.91 |                                                |           |                 |
| Augustin 2009 (longitudinal)    | Germany (German)                                            |                     |           |                 | 824, 782, 732        | i         | Cronbach's alpha = 0.97 |                                                |           |                 |

| <b>PBI</b>    | Country (language) in which the questionnaire was evaluated | Reliability |           |                 | Measurement Error |           |                 | Criterion Validity |           |                 |
|---------------|-------------------------------------------------------------|-------------|-----------|-----------------|-------------------|-----------|-----------------|--------------------|-----------|-----------------|
|               |                                                             | n           | Meth Qual | Result (rating) | n                 | Meth Qual | Result (rating) | n                  | Meth Qual | Result (rating) |
| Augustin 2009 | Germany (German)                                            | 732         | i         | r=0.68          |                   |           |                 |                    |           |                 |

| <b>PBI</b>    | Country (language) in which the questionnaire was evaluated | Hypothesis Testing |           |                                                                                                                                                                                                                                                          |  |  | Responsiveness |           |                                                                                 |
|---------------|-------------------------------------------------------------|--------------------|-----------|----------------------------------------------------------------------------------------------------------------------------------------------------------------------------------------------------------------------------------------------------------|--|--|----------------|-----------|---------------------------------------------------------------------------------|
|               |                                                             | n                  | Meth Qual | Result (rating)                                                                                                                                                                                                                                          |  |  | n              | Meth Qual | Result (rating)                                                                 |
| Augustin 2009 | Germany (German)                                            | 711-728            | i         | Pearson correlation with physician rate of acne improvement = 0.34, patient rating of improvement = 0.34, improvement in quality of life = 0.44, patient rating of medication efficacy = 0.57, patient recommendation of medication = 0.53 (all p<0.001) |  |  | 732            | i         | Two-tailed t-test at T2 and T3 = Difference in means = -10.65; df= 722; p<0.001 |

***PROMIS Anxiety***

| <b>PROMIS Anxiety</b> | Country (language) in which the questionnaire was evaluated | Hypothesis Testing |           |                                                                                                       |
|-----------------------|-------------------------------------------------------------|--------------------|-----------|-------------------------------------------------------------------------------------------------------|
|                       |                                                             | n                  | Meth Qual | Result (rating)                                                                                       |
| Esaa 2020             | United States (English)                                     | 40                 | d         | More clinically significant PROMIS scores seen in severe acne disease than mild p=0.048               |
| Esaa 2020             | United States (English)                                     | 40                 | d         | More clinically significant PROMIS scores seen in those with acne scarring than those without p=0.005 |

**eAppendix 1. Search Strategy**

(A) PubMed search strategy (Inception-February 2021)

Reviewers generated key terms for retrieved patient-reported outcome measures identified previously and adapted these terms for PubMed/MEDLINE. The resulting instrument terms were combined with acne disease search terms and a search filter used by Terwee *et al.*<sup>1</sup> to identify clinimetric studies.

|    |                                                                                                                                                                                                                                                                                                                                                                                                                                                                                                                                                                                                                |
|----|----------------------------------------------------------------------------------------------------------------------------------------------------------------------------------------------------------------------------------------------------------------------------------------------------------------------------------------------------------------------------------------------------------------------------------------------------------------------------------------------------------------------------------------------------------------------------------------------------------------|
| #1 | “Quality of Life”[MeSH] OR HR PRO[tiab] OR HRPRO[tiab] OR HRQL[tiab] OR HRQoL[tiab] OR QL[tiab] OR QoL[tiab] OR quality of life[tiab] OR life quality[tiab] OR health index*[tiab] OR health indices[tiab] OR health profile*[tiab] OR health status[tiab] OR impact*[tiab] OR disability[tiab]                                                                                                                                                                                                                                                                                                                |
| #2 | "Acne Vulgaris"[MeSH] or Acne[tiab] or Acne Vulgaris[tiab]                                                                                                                                                                                                                                                                                                                                                                                                                                                                                                                                                     |
| #3 | Questionnair*[tiab] OR index*[tiab] OR indicies[tiab] OR scale*[tiab] OR assessment*[tiab] OR instrument*[tiab] OR profile*[tiab] OR survey*[tiab] OR inventory[tiab] OR form[tiab] OR skindex[tiab] OR DLQI[tiab] OR CompAQ[tiab] OR Acne Radar[tiab] OR EQ 5D[tiab] OR European Quality of Life 5 Dimensions[tiab] OR SF 12[tiab] OR SF 36[tiab] OR WHOQOL[tiab]                                                                                                                                                                                                                                             |
| #4 | (instrumentation[sh] OR methods[sh] OR “Validation Study”[pt] OR “Comparative Study”[pt] OR “psychometrics”[MeSH] OR psychometr*[tiab] OR clinimetr*[tw] OR clinometr*[tw] OR “outcome assessment (health care)”[MeSH] OR “outcome assessment”[tiab] OR “outcome measure”[tw] OR “observer variation”[MeSH] OR “observer variation”[tiab] OR “Health Status Indicators”[Mesh] OR “reproducibility of results”[MeSH] OR reproducib*[tiab] OR “discriminant analysis”[MeSH] OR reliab*[tiab] OR unreliab*[tiab] OR valid*[tiab] OR “coefficient of variation”[tiab] OR coefficient[tiab] OR homogeneity[tiab] OR |

homogeneous[tiab] OR “internal consistency”[tiab] OR (cronbach\*[tiab] AND (alpha[tiab] OR alphas[tiab])) OR (item[tiab] AND (correlation\*[tiab] OR selection\*[tiab] OR reduction\*[tiab])) OR agreement[tw] OR precision[tw] OR imprecision[tw] OR “precise values”[tw] OR test-retest[tiab] OR (test[tiab] AND retest[tiab]) OR (reliab\*[tiab] AND (test[tiab] OR retest[tiab])) OR stability[tiab] OR interrater[tiab] OR inter-rater[tiab] OR intrarater[tiab] OR intra-rater[tiab] OR intertester[tiab] OR inter-tester[tiab] OR intratester[tiab] OR intra-tester[tiab] OR interobserver[tiab] OR inter-observer[tiab] OR intraobserver[tiab] OR intra-observer[tiab] OR intertechnician[tiab] OR inter-technician[tiab] OR intratechnician[tiab] OR intra-technician[tiab] OR interexaminer[tiab] OR inter-examiner[tiab] OR intraexaminer[tiab] OR intra-examiner[tiab] OR interassay[tiab] OR inter-assay[tiab] OR intraassay[tiab] OR intra-assay[tiab] OR interindividual[tiab] OR inter-individual[tiab] OR intraindividual[tiab] OR intra-individual[tiab] OR interparticipant[tiab] OR inter-participant[tiab] OR intraparticipant[tiab] OR intra-participant[tiab] OR kappa[tiab] OR kappa’s[tiab] OR kappas[tiab] OR repeatab\*[tw] OR ((replicab\*[tw] OR repeated[tw]) AND (measure[tw] OR measures[tw] OR findings[tw] OR result[tw] OR results[tw] OR test[tw] OR tests[tw])) OR generaliza\*[tiab] OR generalisa\*[tiab] OR concordance[tiab] OR (intraclass[tiab] AND correlation\*[tiab]) OR discriminative[tiab] OR “known group”[tiab] OR “factor analysis”[tiab] OR “factor analyses”[tiab] OR “factor structure”[tiab] OR “factor structures”[tiab] OR dimension\*[tiab] OR subscale\*[tiab] OR (multitrait[tiab] AND scaling[tiab] AND (analysis[tiab] OR analyses[tiab])) OR “item discriminant”[tiab] OR “interscale correlation\*”[tiab] OR error[tiab] OR errors[tiab] OR “individual variability”[tiab] OR “interval variability”[tiab] OR “rate variability”[tiab] OR (variability[tiab] AND (analysis[tiab] OR values[tiab])) OR (uncertainty[tiab] AND (measurement[tiab] OR measuring[tiab])) OR “standard error of measurement”[tiab] OR sensitiv\*[tiab] OR responsive\*[tiab] OR (limit[tiab] AND detection[tiab]) OR “minimal

|           |                                                                                                                                                                                                                                                                                                                                                                                                                                                                                                                                                                                                                                                                                                                                                                                                                                    |
|-----------|------------------------------------------------------------------------------------------------------------------------------------------------------------------------------------------------------------------------------------------------------------------------------------------------------------------------------------------------------------------------------------------------------------------------------------------------------------------------------------------------------------------------------------------------------------------------------------------------------------------------------------------------------------------------------------------------------------------------------------------------------------------------------------------------------------------------------------|
|           | detectable concentration"[tiab] OR interpretab*[tiab] OR ((minimal[tiab] OR minimally[tiab] OR clinical[tiab] OR clinically[tiab]) AND (important[tiab] OR significant[tiab] OR detectable[tiab]) AND (change[tiab] OR difference[tiab])) OR (small*[tiab] AND (real[tiab] OR detectable[tiab]) AND (change[tiab] OR difference[tiab])) OR "meaningful change"[tiab] OR "ceiling effect"[tiab] OR "floor effect"[tiab] OR "Item response model"[tiab] OR IRT[tiab] OR Rasch[tiab] OR "Differential item functioning"[tiab] OR DIF[tiab] OR "computer adaptive testing"[tiab] OR "item bank"[tiab] OR "cross-cultural equivalence"[tiab])                                                                                                                                                                                           |
| <b>#5</b> | <b>1 AND 2 AND 3 AND 4</b>                                                                                                                                                                                                                                                                                                                                                                                                                                                                                                                                                                                                                                                                                                                                                                                                         |
| <b>#6</b> | NOT ("addresses"[Publication Type] OR "biography"[Publication Type] OR "case reports"[Publication Type] OR "comment"[Publication Type] OR "directory"[Publication Type] OR "editorial"[Publication Type] OR "festschrift"[Publication Type] OR "interview"[Publication Type] OR "lectures"[Publication Type] OR "legal cases"[Publication Type] OR "legislation"[Publication Type] OR "letter"[Publication Type] OR "news"[Publication Type] OR "newspaper article"[Publication Type] OR "patient education handout"[Publication Type] OR "popular works"[Publication Type] OR "congresses"[Publication Type] OR "consensus development conference"[Publication Type] OR "consensus development conference, nih"[Publication Type] OR "practice guideline"[Publication Type]) NOT ("animals"[MeSH Terms] NOT "humans"[MeSH Terms]) |

(B) EMBASE search strategy (Inception-February 2021)

Reviewers generated key terms for retrieved patient-reported outcome measures identified previously and adapted these terms for EMBASE. The resulting instrument terms were combined with acne disease search terms and a search filter adapted from Chiarotto *et. al.*<sup>2</sup> to identify clinimetric studies.



|   |                                                                                                                                                                                                                                                                                                                                                                                                                                                                                                                                                                                                                                                                                                                                                                                                                                                                                                                                                                                                                                                                                                                                                                                                                                                                                                                                                                                                                                                                                                                                                                                                                                                             |
|---|-------------------------------------------------------------------------------------------------------------------------------------------------------------------------------------------------------------------------------------------------------------------------------------------------------------------------------------------------------------------------------------------------------------------------------------------------------------------------------------------------------------------------------------------------------------------------------------------------------------------------------------------------------------------------------------------------------------------------------------------------------------------------------------------------------------------------------------------------------------------------------------------------------------------------------------------------------------------------------------------------------------------------------------------------------------------------------------------------------------------------------------------------------------------------------------------------------------------------------------------------------------------------------------------------------------------------------------------------------------------------------------------------------------------------------------------------------------------------------------------------------------------------------------------------------------------------------------------------------------------------------------------------------------|
| 1 | 'acne vulgaris'/exp OR 'acne':ab,ti OR 'acne vulgaris':ab,ti                                                                                                                                                                                                                                                                                                                                                                                                                                                                                                                                                                                                                                                                                                                                                                                                                                                                                                                                                                                                                                                                                                                                                                                                                                                                                                                                                                                                                                                                                                                                                                                                |
| 2 | 'HR-PRO':ab,ti OR 'HRPRO':ab,ti OR 'HRQL':ab,ti OR 'HRQoL':ab,ti OR 'QL':ab,ti OR 'QoL':ab,ti OR 'quality of life':ab,ti OR 'life quality':ab,ti OR 'health index*':ab,ti OR 'health indices':ab,ti OR 'health profile*':ab,ti OR 'health status':ab,ti OR 'impact*':ab,ti OR 'disability':ab,ti OR 'quality of life'/exp OR 'quality of life assessment'/exp                                                                                                                                                                                                                                                                                                                                                                                                                                                                                                                                                                                                                                                                                                                                                                                                                                                                                                                                                                                                                                                                                                                                                                                                                                                                                               |
| 3 | 'intermethod comparison'/exp OR 'data collection method'/exp OR 'validation study'/exp OR 'feasibility study'/exp OR 'pilot study'/exp OR 'psychometry'/exp OR 'reproducibility'/exp OR reproducib*:ab,ti OR 'audit':ab,ti OR psychometr*:ab,ti OR clinimetr*:ab,ti OR clinometr*:ab,ti OR 'observer variation'/exp OR 'observer variation':ab,ti OR 'discriminant analysis'/exp OR 'validity'/exp OR reliab*:ab,ti OR valid*:ab,ti OR 'coefficient':ab,ti OR 'internal consistency':ab,ti OR (cronbach*:ab,ti AND ('alpha':ab,ti OR 'alphas':ab,ti)) OR 'item correlation':ab,ti OR 'item correlations':ab,ti OR 'item selection':ab,ti OR 'item selections':ab,ti OR 'item reduction':ab,ti OR 'item reductions':ab,ti OR 'agreement':ab,ti OR 'precision':ab,ti OR 'imprecision':ab,ti OR 'precise values':ab,ti OR 'test-retest':ab,ti OR ('test':ab,ti AND 'retest':ab,ti) OR (reliab*:ab,ti AND ('test':ab,ti OR 'retest':ab,ti)) OR 'stability':ab,ti OR 'interrater':ab,ti OR 'inter-rater':ab,ti OR 'intrarater':ab,ti OR 'intra-rater':ab,ti OR 'intertester':ab,ti OR 'inter-tester':ab,ti OR 'intratester':ab,ti OR 'intra-tester':ab,ti OR 'interobeserver':ab,ti OR 'inter-observer':ab,ti OR 'intraobserver':ab,ti OR 'intra-observer':ab,ti OR 'intertechnician':ab,ti OR 'inter-technician':ab,ti OR 'intratechnician':ab,ti OR 'intra-technician':ab,ti OR 'interexaminer':ab,ti OR 'inter-examiner':ab,ti OR 'intraexaminer':ab,ti OR 'intra-examiner':ab,ti OR 'interassay':ab,ti OR 'inter-assay':ab,ti OR 'intraassay':ab,ti OR 'intra-assay':ab,ti OR 'interindividual':ab,ti OR 'inter-individual':ab,ti OR 'intraindividual':ab,ti |

OR 'intra-individual':ab,ti OR 'interparticipant':ab,ti OR 'inter-participant':ab,ti OR 'intraparticipant':ab,ti OR 'intra-participant':ab,ti OR 'kappa':ab,ti OR 'kappas':ab,ti OR 'coefficient of variation':ab,ti OR repeatab\*:ab,ti OR (replicab\*:ab,ti OR 'repeated':ab,ti AND ('measure':ab,ti OR 'measures':ab,ti OR 'findings':ab,ti OR 'result':ab,ti OR 'results':ab,ti OR 'test':ab,ti OR 'tests':ab,ti)) OR generaliza\*:ab,ti OR generalisa\*:ab,ti OR 'concordance':ab,ti OR ('intraclass':ab,ti AND correlation\*:ab,ti) OR 'discriminative':ab,ti OR 'known group':ab,ti OR 'factor analysis':ab,ti OR 'factor analyses':ab,ti OR 'factor structure':ab,ti OR 'factor structures':ab,ti OR 'dimensionality':ab,ti OR subscale\*:ab,ti OR 'multitrait scaling analysis':ab,ti OR 'multitrait scaling analyses':ab,ti OR 'item discriminant':ab,ti OR 'interscale correlation':ab,ti OR 'interscale correlations':ab,ti OR ('error':ab,ti OR 'errors':ab,ti AND (measure\*:ab,ti OR correlat\*:ab,ti OR evaluat\*:ab,ti OR 'accuracy':ab,ti OR 'accurate':ab,ti OR 'precision':ab,ti OR 'mean':ab,ti)) OR 'individual variability':ab,ti OR 'interval variability':ab,ti OR 'rate variability':ab,ti OR 'variability analysis':ab,ti OR ('uncertainty':ab,ti AND ('measurement':ab,ti OR 'measuring':ab,ti)) OR 'standard error of measurement':ab,ti OR sensitiv\*:ab,ti OR responsive\*:ab,ti OR ('limit':ab,ti AND 'detection':ab,ti) OR 'minimal detectable concentration':ab,ti OR interpretab\*:ab,ti OR (small\*:ab,ti AND ('real':ab,ti OR 'detectable':ab,ti) AND ('change':ab,ti OR 'difference':ab,ti)) OR 'meaningful change':ab,ti OR 'minimal important change':ab,ti OR 'minimal important difference':ab,ti OR 'minimally important change':ab,ti OR 'minimally important difference':ab,ti OR 'minimal detectable change':ab,ti OR 'minimal detectable difference':ab,ti OR 'minimally detectable change':ab,ti OR 'minimally detectable difference':ab,ti OR 'minimal real change':ab,ti OR 'minimal real difference':ab,ti OR 'minimally real change':ab,ti OR 'minimally real difference':ab,ti OR 'ceiling effect':ab,ti OR 'floor effect':ab,ti OR 'item response

|   |                                                                                                                                                                                                                       |
|---|-----------------------------------------------------------------------------------------------------------------------------------------------------------------------------------------------------------------------|
|   | model':ab,ti OR 'irt':ab,ti OR 'rasch':ab,ti OR 'differential item functioning':ab,ti OR 'dif':ab,ti OR 'computer adaptive testing':ab,ti OR 'item bank':ab,ti OR 'cross-cultural equivalence':ab,ti AND [embase]/lim |
| 4 | 1 AND 2 AND 3                                                                                                                                                                                                         |

## eAppendix 2. Guidance for Evaluating Hypothesis Testing

### Expected correlation between HRQoL PROMs of interest and other measures

|               | HRQoL PROMs   |         |               | Physician assessed disease severity measures | Other PROMs (not measuring HRQoL) |
|---------------|---------------|---------|---------------|----------------------------------------------|-----------------------------------|
|               | Derm-specific | Generic | Acne-Specific | Lesion counts/IGA                            | Patient Global Assessment         |
| Derm-specific | ≥0.5          | ≥0.3    | ≥0.4          | ≥0.1 and <0.5                                | ≥0.4                              |
| Generic       | ≥0.3          | ≥0.5    | ≥0.3          | ≥0.1 and <0.5                                | ≥0.4                              |
| Acne-Specific | ≥0.4          | ≥0.3    | ≥0.5          | ≥0.1 and <0.5                                | ≥0.4                              |

IGA: Investigator global assessment; PROM: patient-reported outcome measure; HRQoL: health related quality of life

#### **Other hypotheses:**

The strength of correlation of Acne-specific measures with other quality of life instruments will be as follows: Acne-specific > Derm-specific > Generic

The strength of correlation of Derm-specific measures with other quality of life instruments will be as follows: Derm-specific > Acne-specific > Generic.

## **eReferences.**

1. Terwee CB, Jansma EP, Riphagen II, de Vet HC. Development of a methodological PubMed search filter for finding studies on measurement properties of measurement instruments. *Qual Life Res.* 2009 Oct;18(8):1115-23. doi: 10.1007/s11136-009-9528-5. <https://www.cosmin.nl/tools/pubmed-search-filters/>
2. Chiarotto A, Terwee CB, Kamper SJ, Boers M, Ostelo RW. Evidence on the measurement properties of health-related quality of life instruments is largely missing in patients with low back pain: A systematic review. *J Clin Epidemiol.* 2018 Oct;102:23-37. doi: 10.1016/j.jclinepi.2018.05.006. Epub 2018 May 21
